# Supplementary material for: Global and local tension measurements in biomimetic skeletal muscle tissues reveals early mechanical homeostasis
Source: eLife. 2021 Jan 18;10:e60145. doi: 10.7554/eLife.60145 (PMC7906603; doi:10.7554/eLife.60145)
Supplement: Figure 2—source data 1. [file elife-60145-fig2-data1.xlsx]

## Sheet: Sheet1
Contraction AB1190			10% SDS dissolution C2C12
optogenetic twitch (mN)	ACh tetanus (mN)		day 7 pretension (mN)	day 14 pretension (mN)
0.3	1.1		0.2	0.4
0.3	0.6		0.3	0.2
0.2	1		0.4	0.1
0.25	1.5		0.3	0.4
0.25	1.3		0.3	0.4
0.15	1.2		0.15	0.15
0.25	1.4		0.12	0.25
0.15	0.7		0.5
0.2	1
0.15	0.9
0.25	1.6
0.2	1.5
0.2	1.1
0.24	0.7
0.25
0.2
0.2
0.25
