# Supplementary material for: Global and local tension measurements in biomimetic skeletal muscle tissues reveals early mechanical homeostasis
Source: eLife. 2021 Jan 18;10:e60145. doi: 10.7554/eLife.60145 (PMC7906603; doi:10.7554/eLife.60145)
Supplement: Figure 2—source data 2. [file elife-60145-fig2-data2.xlsx]

## Sheet: Sheet1
	Post length[mm]	Stiffness[n/m]	Error [n/m]	F [N]	x [m]	(estimated) delta x[m]			kappa
Measurement	8	200	16.2149	0.00981	5.5e-05	5e-06			178.364
	12	87	3.70888	0.00981	0.000115	5e-06			85.3043
	16	40	0.7848	0.00981	0.00025	5e-06			39.24
Simulation	4	2352
	6	714
	8	307
	10	160
	12	93
	14	58
	16	40
