# Supplementary material for: Global and local tension measurements in biomimetic skeletal muscle tissues reveals early mechanical homeostasis
Source: eLife. 2021 Jan 18;10:e60145. doi: 10.7554/eLife.60145 (PMC7906603; doi:10.7554/eLife.60145)
Supplement: Figure 3—source data 2. [file elife-60145-fig3-data2.xlsx]

## Sheet: Sheet1
0 kPa	6 kPa	12 kPa	18 kPa
14.495	20.797	35.2665	13.5815
31.8435	74.7005	14.5685	21.6905
56.3875	1.9385	9.22	9.371
10.5715	32.048	24.4085	74.2335
33.64	6.1625	39.829	22.2885
6.597	14.4435	40.057	24.7235
8.994	11.5265	19.7785	24.253
74.4	61.638	35.284	6.7945
43.1675	9.63	33.3655	46.307
20.807	18.809	28.405	8.714
1.4615	7.7735	29.762	28.9045
10.0985	6.928	10.509	50.244
2.2415	21.582	1.35	39.332
5.8205	5.998	39.775	10.626
53.1345	23.0015	38.736	6.7305
8.5375	13.215	8.6545	5.88
8.6695	7.758	32.237	11.4795
13.6675	5.763	40.8265	15.7405
19.131	60.2115	11.8075	13.778
8.7835	14.982	51.1515	11.8645
5.3635	26.3545	4.6135	9.577
46.5465	8.146	31.2095	53.384
8.124	5.8315	2.2315	23.559
19.078	8.01	51.693	37.8725
57.8135	27.707	9.446	53.7615
8.4905	9.165	8.0755	6.2685
21.2865	12.268	25.998	5.055
19.8905	14.2925	11.79	15.6205
5.0165	16.378	7.5245	33.132
3.0315	11.7015	11.5245	37.749
5.982	2.5045	10.6795	30.517
24.481	12.7545	11.34	8.5295
66.1835	4.5005	6.183	5.697
14.0995	8.032	35.456	6.1405
23.882	10.7395	12.8705	15.594
18.524	5.4325	8.421	6.766
13.6435	6.177	9.715	5.042
40.647	7.109	28.7925	12.323
38.2885	6.438	19.86	6.2035
36.756	33.2095	74.119	12.1025
18.5595	41.1615	17.2745	5.067
7.12	4.6015	28.859	38.9405
9.4165	29.722	46.789	1.6445
60.128	30.7605	13.0125	11.4595
7.2575	7.127	20.1755	9.372
24.6965	36.6445	13.289	5.831
27.237	5.284	3.344	13.6545
13.832	7.319	11.2815	9.11
2.405	5.8945	77.531	21.5095
18.0275	10.374	7.1365	28.974
12.826	6.9765	10.476	10.107
63.7995	12.1025	10.219	34.7
41.3585	12.892	14.5185	7.371
4.8305	29.7255	98.097	51.4225
3.1155	15.487	22.271	26.2285
33.976	39.9625	35.8775	77.0505
12.5275	47.4355	42.2465	8.617
16.736	41.1345	17.765	15.746
8.5935	38.562	38.4675	37.541
9.9035	16.1335	26.9555	11.8835
56.143	12.766	19.4825	33.257
11.57	14.2075	50.7125	68.2375
34.029	35.659	11.968	10.8775
6.8355	7.63	23.991	50.6705
32.5395	13.0135	53.8495	7.249
6.3315	10.4865	50.7545	9.291
8.79	8.9475	1.79	31.7715
61.866	9.036	57.3275	10.1215
18.4045	8.2595	31.0485	40.575
59.885	40.269	116.365	9.7865
9.4725	36.9395	22.6155	39.1665
13.053	34.2085	39.779	9.26
4.9885	23.168	5.156	9.3725
42.6085	48.911	12.6365	24.362
10.6035	12.851	10.9425	6.9545
13.398	42.2365	22.851	57.4015
13.418	9.6915	12.172	5.787
10.4275	10.415	26.719	26.5185
12.8465	8.9665	46.419	40.4895
64.889	37.297	9.4065	19.458
7.0815	50.4395	26.999	19.7995
13.5125	57.6555	17.8875	29.777
10.3815	41.453	79.464	41.23
10.3435	38.7455	18.0285	55.358
1.2415	55.44	7.267	35.8405
12.2585	68.8185	12.261	18.2395
15.4315	25.954	12.9275	16.6785
12.354	9.1535	47.761	24.4255
39.7255	6.9615	10.937	36.249
35.8165	7.587	8.896	8.685
18.0995	32.96	24.873	30.405
8.5835	8.9515	41.165	34.989
9.702	8.791	7.073	13.586
30.105	7.3435	11.3385	61.8935
14.2975	7.3825	6.6665	8.011
12.4315	2.952	11.3595	21.754
9.1495	7.268	5.7075	22.352
52.2775	17.067	6.921	28.9605
10.2555	12.997	8.5535	9.337
8.2215	17.365	4.8285	22.5605
7.4095	9.5465	68.158	47.2275
30.653	8.133	7.882	59.4965
69.4325	9.0545	8.911	39.5315
44.3315	50.607	8.2335	58.105
20.573	61.271	7.448	9.5095
11.774	72.574	18.549	34.626
9.672	12.775	14.5225	13.057
19.469	4.5635	122.038	34.858
18.4815	9.08	7.0815	47.0475
10.7265	24.9905	8.4035	24.597
13.2775	7.3025	13.9795	36.0825
13.2445	9.3015	19.309	13.224
16.475	19.563	6.0385	41.174
11.6305	10.0015	47.0655	11.0785
9.2085	3.08	34.979	34.8455
42.275	29.527	5.7555	20.7845
11.12	20.8355	6.468	33.395
29.095	16.768	4.963	9.4215
6.922	41.2215	6.4565	60.6955
10.737	12.273	5.4135	6.414
18.1195	6.383	14.2355	6.557
6.4355	39.429	9.452	35.129
12.013	5.481	6.3135	32.3255
23.9785	10.4865	12.9475	25.6095
45.249	13.454	5.3435	26.977
40.2705	2.019	14.875	17.007
51.872	2.5745	32.055	13.6175
20.5615	7.9795	33.7135	13.3695
63.1665	8.1285	19.6905	27.1405
60.209	1.996	29.746	16.57
17.13	5.8905	19.734	13.1135
45.887	9.9745	15.0115	31.471
7.9555	3.679	10.519	27.971
10.229	10.617	10.856	35.3885
24.0075	11.869	44.192	6.732
19.6755	15.815	5.6375	42.992
31.2735	76.444	10.2645	4.881
12.3725	68.8945	19.0825	7.853
23.2015	6.6695	14.081	8.1495
11.9835	5.071	26.029	1.8265
3.43	23.6765	4.7235	5.882
53.04	5.4685	8.288	7.387
1.517	41.6245	6.4665	11.276
52.1925	8.732	22.646	6.9015
40.869	9.328	5.8825	5.471
14.9375	6.2945	15.5225	19.9205
10.9205	18.146	5.663	5.5755
7.0665	6.547	5.6115	11.8095
35.759	34.562	13.093	13.011
6.8335	7.5165	5.643	17.716
33.7605	10.635	36.124	13.19
7.7175	9.582	7.1645	33.617
58.066	37.534	12.483	18.1135
18.37	7.1845	16.307	14.427
39.2365	9.006	1.8185	9.263
10.7965	16.1875	1.6125	59.524
14.839	8.707	1.409	6.394
8.2295	8.3785	2.9965	6.912
43.6415	5.197	2.8575	18.424
9.3155	12.333	3.0725	10.5965
32.791	55.6985	1.941	6.152
49.219	56.2995	29.4345	6.811
15.8215	33.264	2.4185	8.924
16.5365	13.4875	6.9415	8.968
10.131	11.7545	1.549	19.5035
6.2165	45.055	7.9015	11.5335
29.743	13.717	1.425	37.0535
9.428	6.6945	3.029	55.0225
8.468	6.4655	11.4465	6.258
24.219	7.5155	3.238	47.468
12.3835	11.388	9.431	9.5075
11.979	14.164	10.099	41.2665
13.857	6.697	8.75	7.878
23.345	7.5965	1.6545	26.055
53.3225	7.7195	19.0165	31.324
51.7835	9.0195	10.8405	48.04
17.031	8.4595	1.4605	34.0085
11.461	16.3585	35.6045	25.8315
17.9215	24.2775	8.3515	36.8205
37.18	10.099	8.4015	6.269
15.595	12.5965	9.292	9.017
18.342	6.4665	9.6165	17.8915
35.0815	15.816	10.1195	44.1665
51.292	1.581	7.5905	11.436
25.0215	9.5145	8.1	9.319
15.7795	7.0565	9.498	7.1185
8.8805	5.7605	9.3805	6.173
15.5205	6.6475	1.2405	29.7455
13.5465	7.598	8.471	6.163
14.118	7.595	3.5445	8.415
30.385	5.725	8.6195	6.6795
48.005	8.3185	38.0195	5.9665
9.5745	29.5605	7.6745	6.3125
5.0365	6.3075	5.5165	61.092
11.365	10.3255	7.673	12.485
16.198	9.067	24.655	12.4925
4.4195	10.997	1.9145	6.6375
57.3485	6.78	3.135	17.38
39.9765	8.3165	2.1285	7.4535
8.3645	15.1435	6.5995	10.314
35.317	8.173	1.6245	43.4525
31.0825	10.511	1.61	20.048
37.3995	7.9455	7.824	11.167
5.433	42.139	1.1775	31.6435
12.802	14.6	3.24	24.316
1.6115	9.351	6.7165	8.569
13.345	18.4305	3.388	5.694
1.904	14.913	1.212	30.8105
12.28	8.598	1.836	6.6675
9.451	28.3785	3.78	10.5595
11.7875	37.4015	7.423	15.2645
11.937	8.3665	3.8335	8.507
5.7635	10.0095	2.2285	10.0735
21.279	36.5075	8.084	8.1735
10.995	15.056	6.1005	11.3295
51.599	21.228	3.6285	3.0025
55.559	6.44	2.318	40.6085
56.3335	19.9665	7.9745	7.81
45.317	9.4065	7.846	15.5435
10.9295	7.8855	4.032	10.688
29.8345	8.376	7.0555	4.8955
53.446	6.195	3.8795	35.52
37.4765	17.342	6.2685	5.695
9.012	6.3415	1.894	5.8545
20.6735	7.2665	3.858	6.076
9.11	8.4265	9.817	10.0805
1.815	6.959	3.1395	7.019
29.2205	41.276	1.787	8.9855
6.805	5.7395	3.071	5.4465
9.11	5.9905	16.67	4.904
34.361	5.8545	41.436	13.8425
33.6005	6.618	8.3755	11.958
3.694	4.978	18.6345	12.495
24.442	8.896	10.184	8.577
4.1955	6.0665	8.8665	25.8125
9.4635	6.153	9.4655	15.8885
9.1295	25.362	8.3145	12.485
21.1535	28.9295	18.432	6.9495
11.3155	6.632	16.581	6.5
2.641	6.719	6.4165	16.7815
21.9485	5.9465	9.846	6.2825
1.883	7.734	7.21	26.5685
4.0225	6.058	6.717	8.1325
10.53	19.571	6.767	7.547
7.8095	8.744	7.75	18.878
9.544	7.2885	11.111	5.79
23.447	8.445	7.957	5.383
11.2925	9.151	6.539	5.201
8.697	25.21	9.2075	13.7345
8.98	7.57	7.017	14.7225
14.8575	8.0185	5.3375	14.9245
23.9675	7.454	6.962	9.144
10.0775	11.449	7.9795	7.219
6.7295	6.4055	25.1345	12.7195
58.7155	8.175	13.7365	8.9725
15.2385	9.0805	1.4005	5.249
24.067	6.473	31.41	2.9705
42.825	12.2225	42.0685	9.7525
15.1115	7.072	7.2775	1.6965
13.176	6.484	7.0265	4.6045
14.238	6.01	7.011	13.606
22.0705	10.288	7.0465	5.912
8.254	7.758	7.0275	6.4135
5.636	9.484	8.0075	4.9655
58.022	12.0335	7.5875	6.865
17.2925	7.5785	7.8325	10.876
7.655	11.614	6.4535	61.2655
5.445	8.2855	7.812	4.493
29.4085	9.624	14.7885	8.9815
13.648	8.866	18.1195	39.4655
10.799	9.289	7.8285	6.866
15.801	9.4235	1.9025	7.623
9.7375	8.789	7.191	6.001
17.525	5.9045	7.0485	4.7655
16.2835	5.2965	20.2895	15.598
18.5775	21.4505	10.3485	18.174
27.767	7.739	9.2515	16.0255
8.7365	8.3695	9.158	8.102
40.372	12.0085	13.8495	40.2295
10.5155	25.8525	1.38	6.5155
11.0805	11.7425	8.948	6.429
18.3695	10.673	2.225	6.323
13.058	7.1095	16.105	13.032
11.166	16.4555	13.615	43.9665
49.036	7.355	8.068	18.819
9.5675	21.086	13.2155	8.023
8.4285	8.333	6.903	10.0125
42.5565	8.551	6.5175	1.1785
7.6905	6.958	16.9145	9.2245
11.3845	52.237	9.6555	1.35
13.6085	17.9885	6.5095	39.576
29.897	17.23	6.9205	5.0675
23.482	31.2505	6.8155	11.354
18.0845	42.7005	6.978	11.21
16.5535	13.1055	15.0745	19.286
28.215	8.1905	7.3835	39.008
14.5695	2.288	7.5205	10.496
22.818	9.5765	7.716	12.4585
7.783	1.9425	7.9625	9.712
6.7075	16.7035	17.05	32.605
16.0395	5.9425	30.5955	36.8585
14.7285	25.1045	5.3395	17.4785
10.789	2.5045	9.8865	13.038
11.373	7.617	7.7385	13.1715
2.522	7.435	9.7935	17.172
8.3745	6.7455	6.9425	7.7575
5.836	11.2575	7.7855	11.382
14.224	8.463	9.7405	17.2535
14.1795	8.398	6.7755	11.504
11.7035	7.0835	39.4695	8.2375
22.2745	46.702	12.2605	5.323
6.232	7.466	5.0445	12.1195
17.0765	7.0945	9.202	3.234
13.5025	10.298	7.52	5.3125
7.699	9.671	6.6645	7.6725
9.435	6.0805	8.546	17.047
11.843	1.932	18.663	10.0855
11.557	10.1105	30.987	10.1965
61.911	8.474	8.413	12.056
30.3635	13.4095	1.8765	5.7305
16.9775	6.874	26.57	7.8405
44.4585	8.2355	17.1315	10.481
8.8505	6.8445	5.8175	88.444
1.958	9.65	8.748	7.8735
23.637	10.8625	79.447	23.287
23.451	19.6845	52.526	6.4245
9.083	8.3515	14.995	10.9385
16.7605	8.522	7.967	10.043
35.09	1.638	6.69	5.955
53.487	7.549	9.8275	1.5195
15.329	1.5125	3.7515	6.8065
44.5965	7.416	9.852	8.4305
34.3625	7.6795	14.241	11.1815
12.671	9.4175	1.2395	16.1455
10.1265	6.974	7.883	10.2545
19.7485	7.7685	7.5755	13.5065
5.552	9.843	7.7	8.422
6.6035	9.1965	2.1755	19.1135
11.3685	7.915	1.1985	11.215
5.2215	1.457	25.058	9.7045
11.264	11.0285	9.8275	18.089
20.2935	61.707	6.726	1.3545
12.569	8.86	8.532	3.246
11.8975	8.576	7.8535	14.31
11.115	8.3375	9.837	11.781
4.457	7.7085	12	5.917
45.053	11.341	8.997	10.9715
18.5845	9.486	1.469	12.391
29.462	9.664	7.8745	12.611
1.298	8.83	11.615	17.654
14.7915	8.5055	13.2525	5.5275
9.5745	7.286	1.6895	5.3615
16.3895	17.849	9.22	23.484
34.1845	9.6515	8.2085	6.2265
14.1115	1.212	1.718	8.7615
8.2385	9.7275	8.1005	14.9465
30.5515	79.878	6.889	24.961
15.159	13.9465	7.5795	11.5825
16.5485	42.067	14.2575	13.384
49.572	4.813	13.0145	5.1175
16.5485	22.1535	9.5415	13.642
6.394	10.5145	2.4755	8.626
1.858	131.403	11.821	8.076
7.9605	13.301	1.5705	10.4755
8.5295	5.6775	7.032	33.673
6.7855	4.881	7.529	9.2885
24.7375	7.22	11.3575	5.457
24.085	9.0195	7.268	11.2165
13.9985	12.4525	7.1555	17.719
21.397	5.484	7.934	12.6535
12.662	78.9335	7.756	17.7145
13.607	28.002	13.656	5.3245
8.8385	13.382	8.839	2.342
11.3285	40.648	23.8375	6.468
21.5875	5.151	7.2075	6.518
29.51	21.8785	5.734	1.86
13.3	8.97	18.0445	10.633
6.0115	10.4925	7.201	3.1395
14.29	131.506	1.5945	13.218
10.128	13.3485	5.464	4.311
30.7745	5.7875	13.969	12.3035
20.692	5.5875	1.992	12.03
14.6295	6.7475	7.4535	6.229
17.9805	12.468	7.229	15.975
10.705	9.097	1.3575	6.735
16.8935	16.619	7.673	10.7175
35.316	25.1075	3.683	10.8695
23.956	13.9125	1.546	14.57
9.2125	12.3975	12.492	23.3805
36.4585	25.771	6.7485	6.57
6.247	10.7935	6.1435	21.935
16.1095	5.8305	1.2725	5.6025
51.7815	12.622	6.247	33.441
12.996	68.5295	2.181	24.898
37.3135	5.4455	1.415	35.5115
33.6965	19.476	1.8915	6.539
11.253	34.757	8.3145	13.0875
9.5175	64.6835	3.321	7.1955
6.281	10.5555	28.8965	7.5365
21.349	51.6445	8.73	5.174
15.338	7.938	7.544	6.3805
5.6	5.742	8.5585	6.9695
4.4645	43.7565	8.187	6.2595
10.783	7.9125	8.241	6.3045
10.204	15.584	8.52	14.0835
10.463	10.932	7.6915	24.6475
15.43	4.5165	9.3645	14.1755
11.888	1.4835	25.688	7.0665
13.1595	6.396	18.8425	20.209
12.188	1.262	7.375	37.6735
8.3105	4.7975	7.2645	15.1545
36.5515	19.5215	81.5045	1.9095
29.6555	10.189	8.5445	49.118
12.0695	16.715	7.1085	46.8815
7.542	17.3095	35.7035	14.173
15.405	42.1275	30.5005	6.2685
9.9735	6.8935	7.984	8.631
23.313	9.2985	11.92	7.7995
8.371	9.3045	7.4275	8.436
7.293	8.4035	7.993	18.3815
15.928	9.245	8.223	6.264
15.9695	8.8645	19.8845	22.2065
13.1055	8.9435	7.41	20.0535
9.1725	11.2595	13.9225	6.1625
12.051	8.003	16.173	10.992
6.3585	7.1475	15.353	14.226
11.319	7.0715	1.3975	20.0525
16.92	6.5605	6.5365	8.1865
17.2925	15.832	6.951	3.1615
23.314	6.547	7.637	12.04
44.8865	1.1785	7.746	18.466
25.709	6.614	13.612	1.403
18.295	10.0115	2.7245	3.6185
18.392	34.0665	7.349	1.9175
9.069	9.412	3.585	22.03
13.908	14.579	1.671	1.608
12.509	8.5805	7.4495	3.9
14.37	6.2785	1.491	2.7855
19.127	12.1945	1.31	5.176
19.194	13.1825	22.824	7.3035
24.356	10.12	12.428	3.195
7.3555	8.8505	7.1225	2.0105
22.3335	5.5335	14.741	2.469
22.536	10.4325	23.842	22.1765
25.1485	12.7405	34.6675	2.283
11.2415	19.901	21.854	37.073
22.7055	7.8825	17.4785	57.288
6.2305	11.832	36.8765	13.0485
13.204	6.1135	19.27	22.688
28.616	10.2925	28.0865	18.9025
28.007	9.7145	14.688	41.346
11.2855	8.0905	6.435	8.865
13.123	9.1575	5.7665	6.716
9.414	10.499	11.4725	12.3935
22.6025	1.406	18.2215	1.5115
6.549	6.9865	56.7985	2.5915
6.4995	7.3485	19.336	16.4065
7.7755	14.563	29.6245	33.975
15.173	7.552	43.419	5.4675
15.293	9.6725	23.4715	2.0255
14.217	2.215	1.719	1.729
8.272	10.2455	9.9035	1.9875
11.1335	9.637	24.66	9.3665
13.68	31.493	86.615	12.814
17.3575	44.653	45.029	6.1845
11.1055	3.218	16.778	2.5625
21.559	12.8705	47.831	2.978
8.2785	13.329	7.4215	3.0165
44.1255	26.985	52.484	12.1745
10.7135	7.211	9.0305	7.803
14.1625	30.563	15.492	8.2895
21.03	26.9665	8.921	18.2985
21.896	13.9385	34.534	41.936
7.5185	6.548	19.9245	31.7695
11.908	29.3785	43.4435	6.6565
12.3825	5.5055	57.3905	8.039
13.5395	8.685	87.931	6.4235
13.915	7.552	19.332	41.8735
12.0085	11.663	6.455	8.541
12.0825	9.131	12.548	32.1755
27.526	50.779	6.756	10.7575
14.871	13.261	49.526	27.0515
23.0995	6.697	14.2165	6.067
25.4375	6.4355	18.4925	6.3445
11.1695	7.056	10.2785	7.1025
18.989	7.8435	53.0165	5.2735
6.939	7.492	36.5685	12.8445
14.323	6.761	87.302	5.392
5.3825	1.688	12.6075	6.5475
18.505	21.416	13.064	14.5315
27.7545	7.109	16.277	6.698
15.0265	6.6875	21.0955	10.504
18.077	7.023	24.5235	11.174
23.8625	13.176	11.1225	12.284
21.124	26.46	85.337	10.7905
22.4	11.199	42.285	15.133
45.17	9.147	17.7775	4.967
11.5965	35.4925	49.638	5.3
22.0425	11.0975	66.281	31.1965
15.1235	2.3315	14.6035	17.708
5.5765	9.24	21.7435	1.8835
23.036	7.9485	11.1965	4.7055
8.5895	10.4535	19.6025	43.338
12.44	5.0985	13.2345	1.669
13.39	35.3795	9.932	30.525
9.654	22.8995	7.559	14.1335
15.6105	7.855	14.654	5.971
12.556	21.9305	69.288	16.883
12.989	8.901	14.155	1.813
20.866	2.8965	7.146	1.2795
7.609	84.3565	30.7655	5.015
24.7425	11.1215	18.611	5.3715
27.7485	19.336	4.909	6.002
22.7385	15.2705	15.5695	13.2995
13.936	9.484	49.01	8.022
20.503	62.502	8.4855	15.1145
8.545	5.9445	14.26	16.441
7.437	47.6815	19.6345	7.122
15.4265	7.841	7.9445	15.814
23.14	5.1825	11.197	12.3305
29.737	29.904	16.7555	71.7535
16.229	20.7345	19.011	31.008
19.344	18.5795	46.096	11.2995
27.3805	90.683	5.1955	27.3695
7.173	7.3075	8.4365	16.0715
24.4065	7.7115	8.423	11.451
20.4415	18.0515	27.3815	35.4265
20.1985	7.07	6.322	30.0285
23.2085	8.6095	49.8475	6.4565
60.193	6.749	6.804	23.0535
77.0065	11.2925	11.726	11.7155
17.363	20.551	56.7245	26.2755
22.123	7.533	9.6235	2.101
46.9815	9.371	26.71	39.5185
42.6785	9.1085	8.1895	6.3185
9.0275	2.577	17.042	7.792
43.8345	44.5265	11.494	8.1
16	9.0275	4.9085	10.6495
54.089	18.237	10.927	36.1055
37.193	5.7805	14.775	1.275
29.931	8.079	13.6015	38.215
13.9305	20.322	20.6785	2.509
40.87	5.753	9.5715	9.554
44.9975	22.5775	22.4775	11.6275
35.2475	9.895	11.837	12.4695
6.323	7.65	8.4045	6.7365
34.5755	11.9	9.95	11.8045
10.4485	10.5485	9.536	14.526
9.058	9.814	11.343	5.6235
11.4575	8.598	43.7535	11.551
77.004	2.311	24.128	11.0695
12.7865	11.9615	6.7265	54.6745
44.169	8.7195	7.797	4.0735
14.2015	34.863	26.729	7.0825
11.4905	2.065	5.504	6.1345
11.6735	17.976	5.673	16.9185
75.7305	18.2715	11.954	13.4095
47.0815	28.3265	24.241	39.527
15.137	6.5795	13.296	1.628
22.988	13.6785	119.695	7.6215
29.508	7.1965	7.707	1.6015
29.357	15.9445	22.0985	6.1635
9.682	7.619	6.542	10.7805
14.554	6.77	28.84	5.906
16.326	17.201	7.728	7.79
57.5185	10.2875	6.764	7.699
2.177	9.1545	2.631	12.86
27.598	25.7335	10.164	6.884
9.35	11.466	5.199	5.954
7.635	9.3865	37.4905	2.304
9.187	12.178	6.648	13.162
5.26	7.3305	7.9295	1.8185
8.182	6.6895	19.1285	7.3315
27.894	7.593	63.8735	7.568
12.132	8.1545	41.193	10.1315
8.797	15.1605	7.835	11.1315
38.261	9.346	13.0225	38.215
31.4525	17.5285	6.843	10.895
13.115	6.259	6.529	6.999
24.2455	8.8495	7.5655	15.4595
2.639	12.5405	7.676	12.1575
9.5665	9.595	2.7175	8.0625
10.6045	6.7815	18.26	23.083
7.3745	9.844	6.8	8.5765
16.237	18.09	7.078	27.385
5.383	5.965	11.0795	4.7035
34.909	32.4135	16.6245	10.2205
6.2135	8.511	9.684	8.398
8.2695	15.009	9.8545	16.3
6.268	6.2465	7.701	30.084
15.6145	27.8055	8.0025	54.936
5.2595	8.7665	1.494	5.096
16.755	5.7825	6.8145	32.487
29.0075	9.0265	11.652	10.943
33.761	17.3125	7.056	13.5985
18.0475	10.502	5.8465	49.8095
34.5995	14.7825	4.944	6.9975
2.302	4.5185	1.7865	27.6835
12.667	6.162	39.3515	47.362
26.977	11.332	6.086	20.588
66.1055	18.67	7.5745	21.3175
69.0255	15.126	10.902	91.735
31.531	7.734	6.4295	1.3165
17.254	9.9075	8.2635	10.4615
45.544	9.879	9.829	5.8325
40.7955	5.635	8.8465	37.8835
12.6425	7.4625	5.9215	11.935
63.9005	6.435	6.559	27.063
10.3345	10.7675	6.506	6.827
1.4125	17.703	6.9865	7.2375
3.698	10.7965	14.2265	5.7515
19.749	53.1315	6.4955	6.2165
6.206	12.531	6.867	7.4005
7.92	44.69	7.9435	6.897
8.0845	7.7835	19.5345	7.4
51.909	13.1965	6.0515	6.8335
7.072	8.6565	6.795	7.7695
8.7635	7.177	24.169	7.6655
10.5425	8.144	9.9625	1.2055
19.829	4.652	19.7745	7.7915
46.6875	11.7875	17.505	6.272
10.472	10.8985	11.598	8.3365
9.2115	8.4445	12.0085	7.4005
44.5535	2.049	9.6655	7.3915
29.6605	24.8285	11.348	6.769
62.538	6.3525	5.686	1.29
52.612	4.5345	7.268	13.172
47.809	7.0205	13.637	10.5305
44.4585	16.671	13.0755	8.3225
29.4685	6.9955	6.6205	18.851
64.65	63.5895	9.379	6.726
24.8445	10.9035	4.686	23.5055
17.098	37.075	12.3285	13.1995
9.097	12.913	8.2145	7.142
28.231	9.067	6.6265	10.4555
13.5015	5.1605	8.8985	9.8275
46.1725	6.1125	6.757	8.699
11.325	8.1875	7.1945	7.0065
7.9855	4.952	7.976	5.901
9.063	23.57	12.515	2.527
25.612	6.4265	65.671	6.9695
1.6295	34.2935	6.034	19.924
29.8845	9.581	43.234	8.5495
7.518	9.9745	12.2005	1.484
8.3665	9.82	7.913	9.933
11.583	15.8695	5.777	1.4285
16.785	9.1965	8.2585	7.146
20.259	33.6825	28.424	10.4285
54.3885	18.197	8.1435	10.866
13.1865	14.202	5.197	50.19
16.734	46.744	19.8945	10.5375
24.553	36.9665	80.3775	25.963
5.7535	29.0185	13.717	8.1575
11.139	6.776	21.2955	54.5585
10.99	7.2385	25.4255	2.4165
9.8285	12.488	46.735	8.9465
62.8745	73.084	9.102	7.5335
12.6295	8.04	8.002	17.0245
51.448	30.605	1.5285	10.0865
12.5735	20.632	45.397	8.725
11.4115	6.4025	3.202	6.5505
8.1355	1.24	48.814	8.9615
44.744	9.761	11.305	48.7895
12.376	8.002	8.2145	8.2475
22.447	1.475	2.805	20.5825
38.145	49.6305	9.8555	12.7985
3.7575	8.515	6.569	9.235
57.184	25.8575	8.7895	8.8295
12.5385	2.7315	14.928	6.4595
9.746	7.638	6.9405	21.7175
49.7455	11.0955	1.8675	6.697
57.3305	23.512	12.197	5.235
12.8025	24.4825	6.7655	7.519
52.689	10.1465	32.541	19.0125
21.4305	42.7335	7.4715	10.215
13.18	32.4255	10.657	19.7305
39.289	18.241	6.1515	7.3375
12.051	6.767	8.4	5.9675
35.381	65.4385	6.1675	7.9515
13.5135	41.179	7.577	26.4425
38.6	5.9905	15.103	13.2145
6.296	24.5655	6.483	25.551
52.101	5.1975	1.5485	22.7065
11.532	6.2795	7.4915	5.8405
4.7175	15.463	9.8875	36.606
16.4625	11.6055	10.221	8.842
7.9685	11.7075	9.794	15.545
2.717	7.726	6.9945	77.351
60.274	6.0435	1.2245	39.215
3.6105	17.8665	14.461	14.8325
61.615	6.0935	12.5055	13.178
9.137	7.568	66.5255	12.5665
2.142	7.482	14.23	17.1225
9.372	13.8305	5.1325	10.0135
3.4325	5.4155	12.589	8.4815
40.899	45.04	18.3385	11.507
7.493	6.1405	13.027	14.6095
3.0985	7.1165	9.3705	6.289
2.5975	5.529	7.9035	5.498
4.1645	7.6145	9.2865	22.969
13.7805	7.384	5.0665	2.355
1.612	8.761	7.4975	6.1615
35.891	9.03	5.2505	6.066
6.486	37.2595	11.703	25.5305
3.3315	11.086	11.4545	3.471
12.821	8.0595	12.779	6.3975
35.773	8.3355	12.4735	7.7795
43.1885	5.966	14.3275	8.524
31.3945	14.8245	10.84	8.0935
30.185	8.9105	33.8545	34.6395
6.463	9.5055	59.2325	5.706
8.707	8.278	7.6415	2.171
9.1065	13.267	34.396	11.436
6.659	10.371	1.942	21.8545
5.8905	28.4315	11.0695	7.22
6.0885	1.6835	6.854	7.6515
17.3595	23.289	61.5	8.4785
8.2225	6.979	31.2615	9.708
8.397	43.4575	21.7955	9.6095
11.6515	7.873	6.509	16.323
10.384	7.985	8.908	5.338
14.0115	21.276	9.223	11.202
14.5435	6.6995	16.0055	19.2165
7.9765	7.428	17.892	6.5885
9.922	6.5175	50.127	2.04
35.498	6.493	12.117	2.6765
8.508	10.6805	6.402	9.244
15.4325	6.6855	36.418	8.3585
8.5285	8.007	1.6585	10.099
12.1445	8.159	2.2935	8.09
43.0555	8.7645	24.9725	24.773
12.2895	11.2455	8.606	13.474
8.632	17.5795	18.5415	8.256
7.311	6.8165	9.3885	6.8815
19.333	6.5545	1.7825	3.5505
12.055	7.402	14.593	6.9885
13.6755	8.407	9.263	6.028
15.968	7.877	26.9915	10.9335
10.2745	5.727	19.348	2.543
12.047	53.9295	48.0225	35.0615
24.752	9.1765	12.709	7.4105
11.9615	6.2305	31.3595	7.827
14.4265	6.4575	21.888	1.396
9.419	8.823	19.2875	9.089
20.071	6.9125	57.751	8.2775
27.769	8.9435	45.141	20.6725
21.5415	7.608	22.4615	10.2465
12.1315	13.372	7.8515	2.4695
12.498	7.6645	23.4325	7.2135
17.305	7.891	17.99	11.4005
62.1565	6.057	6.2785	6.2155
8.727	10.5	8.0195	6.717
23.5805	10.6385	11.584	12.925
7.211	10.2435	7.2975	10.624
12.849	8.5375	12.5095	6.5585
9.3365	7.5855	18.082	9.05
47.695	5.768	22.525	23.919
9.636	1.675	13.9375	9.185
6.558	19.107	11.6165	57.0395
13.715	40.7805	7.4585	8.206
9.9165	16.685	9.01	6.46
26.3685	6.23	13.0465	6.697
13.0485	18.0885	2.293	11.925
7.5155	36.7285	7.641	1.63
27.263	6.892	1.6005	8.3975
10.5855	31.246	12.3215	8.696
15.791	14.5565	8.1765	5.2095
5.1595	8.906	35.101	19.408
8.374	9.353	8.53	7.0455
59.212	7.7755	24.224	16.339
40.2435	19.3585	9.28	32.5735
15.3095	7.899	48.4875	9.802
9.1445	10.0375	12.889	27.05
22.9275	7.603	20.8845	6.738
3.2985	6.185	9.7345	7.9205
1.6915	12.2845	16.2525	7.283
20.75	5.8465	25.3815	9.781
44.5875	19.972	9.07	8.6005
9.1745	9.677	8.429	6.949
7.778	5.7895	7.729	1.8725
5.6585	9.952	1.261	2.1735
54.573	7.8825	6.5355	1.5985
9.6215	25.3725	7.3835	1.6735
9.258	6.5275	10.6265	15.7135
16.5485	7.278	11.2115	1.2415
74.707	8.1465	40.265	14.626
73.4725	7.7325	11.254	2
11.779	10.1645	10.0435	3.461
12.892	1.7735	13.3125	6.931
12.52	5.0615	6.8025	6.5745
12.7575	6.2215	6.199	6.623
18.0725	11.4585	1.2635	2.397
7.979	36.978	8.363	11.661
81.034	29.788	8.6295	4.1975
4.759	14.9995	12.2045	14.616
22.747	15.2075	2.6775	7.7265
8.0855	7.3095	8.2195	2.566
37.0795	15.861	9.9735	6.945
17.6565	12.6815	5.237	32.8115
10.7455	25.4965	2.1285	9.2675
7.8595	29.166	9.596	2.041
13.6605	66.314	10.093	8.793
21.3695	14.0205	8.109	6.3645
85.9325	13.463	2.8075	9.809
4.914	10.015	1.2925	9.008
25.0355	14.2995	7.4825	11.223
2.7185	5.5925	8.858	2.533
8.732	8.4205	7.507	6.595
3.5105	8.2945	17.7335	7.2215
44.651	5.3425	2.216	6.7275
19.3415	7.0545	8.6055	11.5195
12.6235	6.1325	31.587	8.295
33.7295	10.16	31.939	10.178
69.419	7.3565	8.456	7.699
8.534	6.5705	65.0355	7.4715
17.172	12.7205	16.4475	7.3015
53.903	27.5255	7.2405	10.216
10.3355	6.882	36.044	12.436
5.681	9.6575	33.0555	2.7735
24.2775	5.6885	33.499	1.536
73.24	4.8975	16.479	8.2265
8.084	10.6575	13.604	2.405
8.1	12.5735	10.395	25.855
5.7165	6.5075	63.0915	1.492
10.381	6.35	64.827	6.741
11.014	13.103	10.2555	12.119
5.7855	6.5845	6.5875	14.564
10.2445	5.59	4.558	8.2385
15.0255	9.9865	66.171	1.686
20.733	3.7895	26.7405	12.748
13.783	8.358	7.8945	2.256
38.1865	80.974	32.988	7.323
77.5965	7.8005	50.5985	6.956
35.546	132.473	4.7975	9.319
15.062	11.0575	29.5715	123.332
9.914	5.681	8.381	7.083
16.8125	8.467	39.5185	44.1355
12.9945	7.6095	28.4675	18.2725
20.7585	57.424	8.311	18.9665
39.989	21.5775	5.785	56.061
80.495	42.888	31.51	6.921
39.0785	17.352	9.7715	8.4725
17.438	6.214	43.648	10.2495
35.1005	33.3065	35.7705	14.8785
48.298	5.2035	8.047	53.457
19.2775	6.4385	11.8405	12.14
2.406	9.358	10.9945	15.5
22.4415	1.4345	16.8215	11.539
85.2355	8.358	3.717	8.857
1.6965	6.963	11.511	10.6755
6.864	9.5465	15.1945	9.1375
6.2425	12.601	14.694	11.946
10.781	16.61	9.407	5.8655
5.921	6.6585	27.772	4.871
14.48	14.172	7.4005	7.0675
12.5535	11.142	20.8785	7.1825
41.243	12.4705	13.956	38.607
6.657	7.2115	6.3645	13.289
8.391	23.89	6.5265	18.3555
56.82	43.4225	12.461	7.471
8.4225	9.107	16.49	2.824
10.5035	7.0935	22.387	15.7425
69.9	8.879	18.606	36.793
34.207	5.662	6.301	12.935
30.581	15.723	2.006	16.861
53.9735	9.8535	1.388	25.312
9.1725	8.896	16.6825	18.326
21.235	6.649	7.9375	31.6885
39.979	5.9615	3.6125	10.867
55.0225	6.3725	33.401	18.781
72.915	6.55	16.9085	26.846
31.446	10.801	2.013	33.265
53.673	7.2955	27.8165	9.041
29.8895	5.4185	23.607	17.6495
19.077	6.6655	35.3475	11.013
18.715	5.963	16.39	8.1345
110.101	1.406	3.5225	70.8965
12.0465	10.5745	1.3685	2.515
10.629	38.058	63.893	5.4435
7.0055	40.816	1.443	16.587
51.608	23.473	1.5975	6.151
8.6075	46.0875	2.291	9.591
9.0835	22.252	2.5295	24.9845
7.569	55.4805	1.618	40.518
57.823	20.167	1.5255	47.412
62.0245	33.8425	1.706	15.6765
19.967	35.238	4.286	28.484
9.452	14.8545	2.1495	95.497
7.127	10.3855	2.1245	9.288
17.308	9.898	1.6365	7.655
21.053	10.4155	1.461	32.829
21.0175	10.864	1.4805	24.69
50.4565	9.459	1.6475	31.3555
14.893	43.6675	1.53	43.0415
10.0925	24.99	2.3035	42.65
70.2255	39.358	3.6495	58.4525
10.2645	8.2935	2.0205	11.619
11.414	16.35	72.3225	5.9995
53.6235	27.555	3.0535	7.0335
18.298	7.5275	27.9245	52.923
9.6455	10.5895	7.7975	17.345
16.257	6.939	1.5765	16.142
7.0595	8.337	2.718	22.901
4.777	1.692	3.153	9.1195
11.5115	9.791	2.203	13.5255
8.1	5.3825	2.61	6.547
7.676	38.287	2.9225	30.975
40.729	46.9035	1.8525	15.4535
5.234	11.986	2.2305	28.5665
6.9775	21.0335	2.244	10.982
17.3365	8.621	2.988	11.1605
5.492	11.17	1.268	6.1935
11.995	6.727	3.305	15.161
11.796	6.538	8.758	30.1735
9.8295	38.665	1.3685	11.8715
17.5445	9.0575	1.678	13.685
7.707	9.286	12.218	31.232
1.587	9.5905	1.455	48.0255
17.607	5.763	2.776	18.9065
13.1295	5.6105	1.343	37.665
1.6795	11.897	11.3695	7.3115
17.346	6.832	10.671	3.5405
3.2	41.055	13.585	6.958
7.026	17.506	6.4995	13.274
10.5315	2.656	28.12	19.4
1.8275	4.618	25.516	34.761
15.249	5.1165	2.2805	70.4295
1.8805	6.4255	1.455	43.9085
10.5805	15.1945	1.615	36.625
83.077	15.263	8.731	11.927
7.868	6.779	1.604	20.8555
13.011	7.7675	1.845	41.4175
49.2675	9.945	1.936	8.43
90.1915	7.6965	9.3615	25.1555
85.5695	6.0525	28.036	30.5465
110.611	7.5505	29.8755	37.667
21.0265	9.035	12.4405	5.7275
11.05	8.823	1.8405	30.857
75.441	12.9915	3.744	8.706
8.121	6.61	7.7635	39.987
1.274	12.019	7.0535	13.3145
66.4245	9.3655	43.778	19.4035
23.6945	11.559	21.005	42.9435
72.522	8.44	5.9775	15.925
6.394	9.4485	27.224	9.685
23.6705	7.987	11.951	56.934
12.324	7.302	7.9145	27.622
56.79	9.3135	8.264	13.1585
56.723	6.864	10.661	25.2205
7.947	5.953	6.2365	8.8345
53.6215	8.0485	6.852	37.7955
47.068	6.192	2.8765	8.8805
68.123	5.17	1.5785	20.9065
6.247	6.7355	2.9155	7.542
14.253	15.6655	2.1675	42.2755
51.726	14.949	1.3035	20.9085
10.916	6.9435	10.7855	15.0745
54.271	7.0155	3.5785	7.3495
97.806	11.921	2.9415	20.7995
98.2615	14.55	4.0005	9.0105
38.603	76.049	18.6505	34.0315
17.31	21.4395	2.038	32.4105
50.4985	10.509	33.838	1.3615
10.5655	2.59	7.3195	15.895
41.669	14.43	9.848	33.2345
15.2475	2.233	20.627	28.996
5.842	14.695	6.5395	27.774
10.5735	14.6385	10.5545	8.4835
14.5875	2.5235	15.4095	5.977
5.4685	1.8525	61.784	10.4945
15.42	3.0245	77.9765	16.6355
24.093	19.808	21.53	20.6505
53.1545	1.3415	38.439	20.132
9.54	2.572	10.82	32.0675
77.0165	3.024	23.7135	16.338
1.206	12.0195	5.3355	37.092
17.0105	2.1565	22.677	16.4225
9.339	3.137	59.309	7.0535
10.1555	1.478	13.69	8.6545
18.7095	1.754	15.4415	16.4105
75.596	1.4435	6.268	13.7515
10.247	8.039	7.015	10.4295
8.553	1.242	5.961	29.774
90.644	3.224	11.201	41.1705
33.6415	3.331	9.5535	12.0905
9.64	47.29	6.764	7.062
96.863	6.707	10.1265	12.468
99.336	7.4275	6.63	27.987
94.207	8.791	8.7735	10.907
1.4565	9.7125	7.5625	54.574
16.153	11.691	7.6115	6.2645
78.148	5.098	11.706	9.4525
30.949	7.8945	6.883	12.497
52.3135	7.9155	6.269	10.477
6.3	6.125	10.324	3.8375
5.597	7.811	9.3655	13.9525
69.649	10.674	8.578	35.6135
77.117	31.966	17.2445	28.004
6.8235	41.211	5.424	18.5335
23.107	30.6285	11.2015	7.9295
12.8015	14.072	4.709	44.9085
14.295	10.693	16.373	46.0165
11.8705	30.449	7.419	9.1235
116.623	6.2045	5.0735	9.366
32.125	7.3375	15.391	28.89
11.426	39.132	5.5255	24.513
13.038	11.5795	6.21	12.373
33.4885	5.7005	10.9715	9.5175
109.844	6.7695	5.2475	30.783
9.152	8.059	5.5415	46.4135
9.245	8.918	6.919	20.145
42.782	6.4215	6.1225	18.3245
7.7975	5.367	6.2375	5.615
9.166	7.8435	22.238	6.119
52.421	7.2075	8.619	28.1855
37.1935	6.2215	17.956	7.9765
4.8775	7.704	8.8625	46.111
33.3365	8.475	5.8765	13.6805
13.1505	6.8065	12.297	7.653
13.067	38.1915	13.715	4.955
15.655	6.8055	28.912	5.333
43.808	41.351	6.352	9.677
14.481	8.789	6.4	12.833
3.1585	6.4415	7.3585	36.0235
9.107	9.6	9.874	7.019
32.824	5.8905	5.9015	7.21
1.334	8.349	7.994	12.988
2.264	9.9795	11.508	46.516
4.9345	6.8345	7.287	33.731
20.0625	6.486	7.408	7.7665
34.4725	22.2915	7.0745	23.8795
60.54	9.515	12.4785	9.0635
50.217	10.477	5.5575	9.692
5.9995	6.7125	5.414	7.0155
17.976	10.4475	7.2965	7.052
2.3705	8.4965	8.5	7.525
6.1725	6.246	6.272	3.312
5.613	6.9215	14.095	2.893
8.4685	11.66	31.2335	9.6025
12.098	11.081	8.6385	16.549
8.7515	9.8965	17.441	7.836
8.116	6.9005	5.575	7.0345
2.7565	8.3095	46.4695	6.7845
5.869	7.9215	94.9825	35.8315
8.262	8.052	1.43	6.4825
8.276	8.3595	11.7795	15.7615
39.418	18.649	17.0435	10.2105
71.937	8.3875	8.8425	62.4405
6.599	6.4775	8.167	18.151
8.8365	7.8015	8.73	59.4375
4.151	7.4625	8.6045	28.1
8.324	14.132	9.1475	23.0945
3.983	6.8635	20.719	40.0495
32.0985	7.751	43.594	12.8455
16.7855	6.3845	7.534	22.1475
6.67	81.7285	4.9235	18.5435
1.534	4.687	10.9155	13.493
15.5345	14.25	7.3055	29.747
18.718	4.6375	13.2365	57.1355
40.1415	47.6895	8.63	19.1295
16.5575	60.889	12.2835	21.16
33.704	6.4045	8.8175	9.0885
9.3235	13.299	7.4015	12.984
1.2825	9.151	5.7025	15.7985
3.5815	5.508	22.938	28.0875
2.0845	9.0975	6.089	12.8435
2.6525	26.8315	9.4135	27.0195
3.516	9.2235	6.067	21.1205
1.8915	53.6005	13.9905	8.5875
1.2405	1.8375	7.3415	34.886
1.4385	7.23	5.5725	14.64
35.1315	55.26	28.2565	31.631
10.253	8.164	6.132	6.226
3.9745	6.663	5.422	6.726
8.9545	9.755	12.8745	51.8645
2.047	19.82	6.776	54.8455
2.1545	28.107	17.182	84.876
2.065	31.6125	12.969	49.8595
2.158	28.67	5.9985	2.7395
2.574	8.567	14.7905	13.7435
1.958	5.358	5.8495	20.8305
14.2075	8.3995	8.964	5.762
3.134	8.198	5.17	17.1975
1.979	5.5755	10.958	24.1025
2.8165	5.8425	8.2155	47.365
7.4825	5.362	5.1695	15.766
9.54	67.581	16.7905	32.7455
1.2095	15.628	7.565	35.455
5.421	13.091	10.736	28.402
11.978	8.552	28.8545	17.8045
5.5055	6.894	9.5515	30.5035
8.8935	5.517	6.3535	12.4635
5.692	5.16	7.2375	7.1265
1.6995	5.7155	10.543	18.2115
2.756	7.152	10.5365	41.8295
42.2415	6.0535	13.6815	10.7065
12.7975	7.3925	7.913	10.1835
30.123	9.203	35.2535	8.0915
92.321	6.087	5.5455	11.9335
1.4185	24.582	31.5885	28.2305
7.1565	7.6005	9.551	48.4955
41.222	9.4425	13.734	40.531
45.544	5.353	12.022	32.6875
41.1685	39.1505	5.879	56.3205
39.536	28.1025	35.789	32.2805
38.4845	28.998	1.1795	24.0435
41.54	29.383	11.835	13.978
12.6985	23.415	6.1985	14.1875
8.111	5.9545	8.8755	8.6685
13.828	28.121	4.7575	33.381
13.164	14.183	11.166	20.0635
14.09	43.204	11.315	37.411
6.7675	29.397	1.1775	54.658
6.4175	26.325	6.5365	17.2245
6.418	27.0055	1.793	34.1035
1.25	9.9365	6.5165	44.1535
7.6325	30.403	13.2315	15.322
11.6265	7.277	10.669	7.9465
4.1595	9.3825	10.014	57.5275
8.896	8.6095	5.9715	5.898
33.5895	8.1515	6.8525	43.906
1.913	5.6245	10.07	22.7395
6.507	13.2395	37.455	8.669
1.6365	8.453	8.475	33.923
7.1295	15.9885	12.5935	40.1955
46.1065	9.608	6.5985	11.636
16.507	11.8975	15.703	40.052
2.033	5.6075	15.8865	13.594
16.6595	5.481	7.0915	8.799
1.206	6.2805	5.99	33.1285
92.1755	10.2225	11.3895	16.4945
1.3525	40.1755	6.4395	32.6925
2.152	43.273	6.1195	60.0375
5.946	5.4325	11.5045	13.257
1.7635	6.7565	6.5925	27.279
21.2335	11.3625	7.201	33.616
1.5515	2.1805	31.919	43.023
10.144	2.4005	44.1045	34.8045
10.7125	6.9865	5.891	15.1
2.3155	19.0315	19.7115	25.1625
18.104	15.367	10.1235	8.3015
20.5015	40.116	5.843	30.888
7.413	44.9485	12.216	35.8815
9.2785	40.6635	9.4425	5.9555
14.416	12.9245	15.268	5.6845
70.561	11.0235	7.9945	8.2965
11.0835	5.7165	11.3235	50.1675
27.9105	17.4975	6.618	31.733
3.515	7.119	7.2635	16.8965
1.842	18.0955	6.2485	15.0205
72.1085	10.7965	10.274	14.4235
8.16	6.11	3.1865	11.652
14.872	32.1115	11.4745	4.7285
8.8025	34.2955	16.8715	16.5445
10.422	9.653	7.0805	22.053
87.688	6.2915	3.1235	12.5055
7.5195	32.219	9.1875	11.419
8.937	32.173	9.5465	5.5775
11.013	19.4595	17.951	9.653
3.395	20.235	17.9225	20.8065
12.9475	25.9495	26.4675	6.066
31.648	52.55	17.696	50.9
19.2745	13.607	7.4475	32.1615
8.63	28.734	13.036	16.4195
8.046	39.796	8.018	5.3845
2.0895	50.1495	24.183	6.8245
13.3165	38.778	17.9335	14.082
21.0295	33.7385	8.7285	6.6095
8.2935	12.43	15.96	12.568
2.4495	48.775	15.4665	10.1255
11.5665	18.0175	14.54	1.4605
7.3575	45.742	16.1205	6.334
63.676	108.828	22.0155	50.8255
38.699	60.156	10.307	6.482
86.6935	58.7695	8.4125	7.8175
20.752	47.9655	36.142	1.5535
2.016	50.6075	10.419	14.923
24.2885	37.105	8.084	8.207
56.1345	22.079	9.382	4.043
2.046	141.579	38.0275	7.471
2.185	5.889	41.7085	7.578
14.922	6.93	9.2725	38.5275
2.6645	20.348	19.6925	8.2385
1.4935	7.894	7.775	34.576
2.2575	12.442	8.33	5.0795
4.453	55.786	5.578	9.1465
2.2125	23.719	7.383	6.3525
11.2065	71.511	8.083	5.938
20.6165	36.4635	8.077	6.2285
13.635	37.225	6.4765	59.778
2.4085	49.5915	11.0335	6.8715
75.45	23.9455	5.693	125.582
9.4175	11.9285	27.1185	29.0345
3.9555	11.704	7.056	45.8465
11.901	62.846	8.979	17.6625
9.352	7.766	10.6555	19.582
2.9305	8.0595	5.1345	21.7595
9.7305	2.6545	13.1835	37.1935
12.179	96.913	11.8055	10.308
45.4715	23.2025	17.201	17.0625
15.7825	35.248	6.6115	7.9005
5.588	45.463	6.8355	35.178
14.2295	22.4675	15.773	51.4055
10.5735	8.4285	40.2155	6.1405
16.0485	20.0675	32.3	10.572
10.8585	27.9515	5.6095	24.27
11.553	20.438	31.254	18.7245
8.5385	42.4815	6.1725	44.154
16.8655	56.3565	13.6885	8.2815
20.569	11.662	66.9315	8.491
76.563	22.154	25.8605	84.5535
45.817	7.917	44.596	15.364
14.2875	22.6475	4.729	40.5975
1.2725	5.7385	6.4685	22.888
50.0515	7.605	5.624	19.85
9.853	18.4345	8.4135	12.0365
12.3255	6.8625	5.458	7.6545
41.5995	39.207	8.327	20.039
1.637	1.2685	6.2365	11.2955
7.289	1.449	25.354	8.9355
12.049	23.016	17.7255	22.111
18.295	39.733	7.387	10.9575
39.0525	10.893	8.6925	6.819
39.0745	58.2675	14.28	34.129
53.166	6.219	11.946	10.44
10.44	5.655	39.848	17.1095
57.941	7.2765	1.6115	4.86
11.4395	15.146	8.554	1.847
12.2325	6.342	8.9185	6.1945
20.6395	10.2125	39.1495	1.915
19.966	8.2795	10.1925	8.2785
10.171	10.998	26.058	7.952
9.6195	5.212	16.116	6.4305
16.8605	12.2265	6.1755	16.735
9.9135	7.754	7.465	7.5825
13.5725	5.888	8.822	6.9875
7.563	8.068	4.7305	6.498
11.4105	6.785	10.5055	6.061
9.541	7.7395	8.616	9.7285
10.5605	7.5405	8.3605	7.158
23.26	6.102	19.22	9.3865
8.937	5.9425	8.469	43.0945
47.4005	6.1205	9.571	7.3755
9.4855	7.86	5.5045	8.12
83.986	11.5255	14.3675	14.052
6.4675	7.728	1.8815	11.3815
7.3105	10.688	6.509	11.0815
9.0105	6.526	15.534	24.4365
47.2905	9.28	6.145	24.1655
6.161	12.389	7.211	7.192
53.013	6.2385	7.017	2.3035
13.7525	7.382	32.549	3.108
8.7045	2.395	7.672	1.824
71.157	10.9975	8.011	4.3915
15.7165	5.578	13.3775	3.7625
6.7145	16.775	2.802	2.422
59.3105	7.4435	8.7005	1.6335
18.429	17.8355	34.153	7.5595
2.0525	1.164	39.7885	1.504
9.6165	12.51	12.621	2.7935
90.1615	10.011	11.4955	2.9455
19.8765	8.4435	43.9345	2.9765
59.3435	12.7125	8.29	1.7225
58.6475	7.6755	24.926	4.112
15.574	5.94	14.8365	11.927
25.217	6.326	26.893	1.8405
12.0485	19.004	20.58	7.2035
7.949	39.953	39.7705	14.333
3.841	11.4055	15.11	7.9705
16.208	9.3685	27.974	1.93
9.622	6.7475	38.307	16.8335
6.079	1.33	12.6105	16.764
14.87	6.704	31.7745	7.9195
1.6695	12.0065	15.357	6.618
58.409	6.135	7.481	7.4535
24.226	7.724	29.626	6.015
28.1515	8.5425	41.7865	5.869
89.572	49.1495	16.0575	5.528
10.3625	8.057	33.5985	21.745
64.817	6.9675	17.567	10.4755
22.2185	7.634	25.0995	15.0535
9.715	8.903	14.707	2.2445
8.5585	8.1075	45.4285	2.4835
14.3425	5.097	1.566	50.2295
32.0175	7.6045	1.513	12.348
14.005	8.3115	3.416	6.1615
7.1565	8.522	11.5235	7.592
89.537	6.3225	2.1025	7.4765
41.078	2.1325	1.5965	10.421
41.836	1.6685	4.2705	6.6695
11.2755	6.2815	23.215	13.079
16.2135	6.579	10.7315	6.689
80.862	7.82	13.581	12.9195
7.817	10.8265	91.8545	8.206
10.002	10.365	9.136	9.3135
10.865	9.8	21.707	54.1475
2.6105	7.3495	50.615	9.4075
8.1305	8.236	15.271	11.7125
9.2795	6.714	8.957	2.4005
46.0605	9.137	9.975	8.882
8.917	14.8185	19.519	34.4965
14.0635	3.133	24.1845	9.5345
26.1115	8.4875	39.711	7.649
101.74	7.2755	10.993	14.374
73.6555	13.361	37.112	6.639
105.722	9.287	10.5065	18.698
12.621	11.311	85.884	6.58
68.756	10.3795	58.2925	10.5865
1.4685	8.6615	30.26	54.795
19.6135	1.723	27.0095	6.747
10.3225	15.615	34.797	18.092
20.182	32.2045	7.34	12.267
3.312	34.3795	10.889	41.3185
63.6595	6.5465	9.78	35.366
9.7595	2.5795	23.019	86.466
11.6045	22.476	18.9265	61.7985
7.7065	93.346	10.428	14.9545
6.6575	68.582	12.9205	45.571
7.9215	27.437	5.221	2.1595
6.34	20.456	38.9595	31.2745
4.336	43.576	15.4125	31.6145
5.3835	14.5985	35.523	18.1865
1.805	7.2005	15.9685	9.612
12.423	3.366	5.0405	2.112
1.25	6.0445	47.9875	1.83
12.0065	9.2755	14.218	17.783
7.3285	38.35	24.9595	14.725
16.862	8.2255	34.497	6.205
7.0265	36.789	15.971	6.491
16.81	35.622	12.546	10.7185
1.84	41.758	16.317	10.691
13.949	16.138	11.5195	13.5595
7.2685	46.5835	10.908	13.011
13.9125	7.876	30.1955	13.705
9.1215	12.883	45.3305	32.4585
16.619	77.904	21.2645	5.2585
12.704	110.465	6.696	29.254
6.7965	10.382	34.2905	12.525
7.9045	6.406	14.213	28.501
62.043	15.3505	22.9165	34.203
2.7355	3.2035	7.6645	21.8175
58.6335	10.2985	22.316	8.4825
21.4835	11.7785	31.728	7.402
27.74	7.1925	7.654	1.1655
47.9805	5.1475	41.6645	5.1245
38.356	46.9685	8.584	5.0695
23.6705	1.484	12.5015	15.132
27.0525	8.079	19.262	5.2965
59.995	11.4215	35.6125	13.241
57.32	10.328	9.916	1.3395
57.027	10.5475	32.6025	14.9325
41.392	9.598	7.891	4.934
8.289	23.386	22.578	18.6705
71.5715	23.267	43.54	17.794
16.0545	10.75	7.194	7.4845
52.948	28.035	33.612	20.292
2.607	8.661	47.8815	41.3625
17.126	11.0015	39.7885	6.9895
33.242	8.075	9.011	9.169
10.9285	34.2625	6.0855	15.937
4.9255	13.8035	16.4635	7.6385
11.782	7.3375	151.735	19.952
14.934	3.6485	9.5915	32.5055
2.4875	34.1615	25.3615	18.0765
7.3125	32.433	63.7435	5.386
11.113	7.9255	6.097	9.413
4.6735	11.7035	17.309	8.4465
11.304	13.7855	42.5795	18.885
7.508	3.5055	10.3825	32.737
6.648	23.062	52.113	46.3665
46.7245	46.525	11.944	7.6295
53.1905	16.099	29.1345	17.5755
2.3235	98.514	8.8275	1.458
14.9615	66.2455	67.8985	11.1385
20.1595	24.109	8.604	7.0355
13.8225	12.0275	55.0965	6.594
7.3485	13.606	8.377	2.2135
7.409	11.6745	33.9705	19.951
7.3735	44.5315	14.2085	55.3115
6.1675	18.8725	9.6185	34.7395
8.111	7.903	6.7755	7.375
13.2515	16.7405	67.0535	43.595
12.2755	17.2875	28.76	2.1435
80.7115	10.295	34.022	12.001
11.809	8.782	56.113	32.627
7.376	10.1455	144.831	7.8855
10.3265	27.759	11.8795	12.274
7.629	9.6775	4.729	6.427
10.259	5.8995	6.373	8.1575
6.0035	20.936	49.6055	6.5355
2.735	27.6215	11.613	12.112
54.4595	101.529	7.672	10.144
43.1885	16.8715	13.6825	16.599
14.176	18.547	4.61	5.6935
7.775	15.873	10.86	9.749
13.7405	6.588	2.768	7.349
55.878	2.6745	23.1555	6.5025
81.325	10.287	5.9875	5.24
54.0025	28.8575	13.074	11.704
5.7005	26.047	2.8235	17.482
10.3275	1.8895	10.095	10.773
5.8965	1.9315	11.216	12.109
38.267	11.4515	8.0615	5.3135
16.208	1.6895	6.3725	8.7135
18.9885	1.274	35.492	10.371
6.2215	1.435	6.226	4.456
38.5825	15.4415	5.576	9.9595
13.5885	1.999	45.4865	34.665
9.2535	3.578	22.946	20.534
10.459	2.3005	9.156	5.74
56.068	9.5195	6.445	17.0645
9.7845	1.6285	6.888	2.0895
128.522	10.11	6.259	4.848
37.436	2.509	8.909	5.5165
24.591	1.554	6.862	5.2605
45.604	1.6445	14.482	8.312
4.5415	11.4475	62.943	23.9555
41.4035	1.9125	12.311	2.933
59.6665	8.828	12.0525	41.699
38.781	1.982	40.1545	17.2145
9.313	7.369	6.29	14.333
13.9715	6.1725	25.9015	32.2825
89.7285	8.365	22.345	14.827
11.959	11.1735	4.828	14.2055
16.1365	8.757	11.089	28.454
6.7645	11.359	7.9355	6.7865
7.072	7.7325	11.7475	8.2455
15.8975	19.888	28.409	8.373
6.312	8.645	8.8715	8.1995
6.456	6.094	9.0925	11.51
8.68	8.2645	16.6405	5.7105
1.4045	7.9615	5.3475	20.833
4.5065	33.8115	17.3365	9.323
45.2775	6.4255	5.3325	6.6555
55.8845	6.987	6.333	17.8625
8.123	7.094	11.9715	14.601
12.398	7.215	19.1035	18.9705
10.2115	18.0895	7.852	18.091
12.023	7.92	6.657	13.1445
3.3785	6.745	9.4445	15.3955
12.132	9.0205	12.837	8.2865
12.2255	38.2725	26.6005	14.6355
18.826	7.708	16.045	6.2255
16.089	16.1725	45.3525	45.1475
19.3635	6.3365	9.05	7.5505
23.3545	12.114	7.707	7.4
21.7995	6.7135	7.31	10.9555
39.077	23.485	8.3905	20.4825
14.46	6.9315	3.0855	5.258
13.106	26.3845	7.671	33.0935
5.65	1.181	7.57	10.0575
9.6295	13.9655	6.96	10.2815
40.529	18.0065	13.23	64.702
21.7745	8.4965	1.667	15.808
27.6495	8.6095	8.2495	48.769
5.1735	7.1305	7.4915	19.758
64.331	7.71	6.443	6.574
20.8585	2.8035	1.8715	25.187
10.7145	11.837	7.4895	10.517
13.856	6.7815	6.942	3.381
53.8975	9.254	12.2435	10.137
18.952	8.1255	7.096	9.326
20.755	7.8175	12.3515	13.476
5.542	8.618	9.352	49.4545
49.0495	40.3095	1.664	7.5965
30.1165	5.4445	6.578	8.237
21.5485	11.0515	7.2605	10.3185
23	7.5445	9.5685	8.6765
21.5555	36.665	8.4885	5.8905
28.4345	26.4195	6.8355	8.944
8.414	11.805	2.3785	6.002
10.178	27.949	10.6905	1.268
12.5515	8.7435	7.603	1.937
19.141	16.673	61.322	82.8715
8.035	10.398	7.77	11.684
63.0325	23.545	13.6525	46.3065
59.316	3.145	7.444	10.979
26.182	2.9995	7.986	8.2865
9.607	3.68	7.3825	49.462
9.6845	5.7275	7.2025	10.9005
10.5495	10.2915	8.1115	18.937
43.2125	6.1185	8.3215	10.7775
7.097	24.472	8.5375	9.6155
20.392	20.7465	7.622	1.7915
18.0855	27.7525	3.1455	7.891
40.676	28.8465	8.317	6.9225
51.6125	6.0205	1.636	11.762
6.2375	4.7015	18.993	1.902
12.1395	18.7395	1.1775	10.307
6.4865	42.4065	2.1695	1.274
10.576	45.37	9.8215	42.106
11.3615	17.1605	9.266	1.9285
12.112	8.303	8.4205	1.65
30.024	9.867	10.4855	4.509
6.5275	16.3555	11.8645	9.315
6.3945	7.682	11.81	9.2165
3.55	26.3895	11.255	7.437
32.428	15.977	14.1275	6.7665
8.8095	33.7325	15.732	21.0355
6.8815	11.07	7.275	2.496
8.5995	25.3805	3.159	15.5045
12.318	10.268	29.21	8.8085
12.3915	53.2935	7.2255	11.252
12.5295	2.5745	10.8845	7.127
53.7565	8.85	3.4785	8.524
23.536	29.9825	7.4005	18.218
43.671	25.071	2.9545	9.3365
29.1905	9.7855	9.3335	47.8095
17.217	11.333	35.3505	7.5595
19.38	31.666	2.7165	16.702
16.2435	2.4325	15.7165	1.619
11.432	7.276	12.3765	7.698
21.454	18.9605	7.6035	8.8355
12.7905	14.774	14.5335	8.2165
76.6775	5.238	9.8985	8.3985
13.5815	51.9745	16.3585	7.8025
1.8335	11.753	7.5625	7.768
4.1915	12.6685	9.1225	2.043
13.486	12.278	28.146	1.6765
57.625	34.689	20.7675	8.5255
9.6245	28.709	13.7255	2.321
22.0685	38.8125	4.9475	7.5515
6.911	19.943	5.8785	1.8705
48.086	8.2725	8.27	1.787
14.965	2.5645	6.289	7.8195
67.54	4.421	6.0425	3.7085
13.6115	21.91	5.4615	1.31
54.3525	43.227	6.0285	2.095
14.328	17.763	21.9505	2.553
9.7995	71.119	13.3435	7.9825
74.6995	7.5425	8.6895	1.9475
13.0715	9.8665	9.168	2.8095
13.2215	9.0705	5.3595	16.129
63.6445	8.5145	6.476	8.359
10.456	7.5655	5.374	6.4605
6.001	7.7445	7.9855	2.194
13.4155	7.9215	5.096	42.1955
25.689	1.9565	5.956	28.236
22.5615	7.1505	6.9385	11.1215
13.0065	7.859	8.029	10.437
46.1055	9.746	6.4685	14.175
7.2835	9.359	5.9445	31.4055
13.8365	1.465	6.9425	8.274
8.6065	10.429	11.81	7.479
8.745	9.758	11.4235	11.399
51.15	7.7695	6.633	52.8165
47.121	35.9365	10.703	11.708
73.284	12.3815	10.2935	5.5755
16.495	8.485	10.42	37.746
9.006	11.621	6.1215	49.8215
9.9205	7.9445	5.238	17.931
9.0685	17.1165	10.769	11.508
6.639	8.0645	6.57	8.722
6.8335	7.273	6.3975	9.1785
1.9275	8.0755	7.236	10.289
21.823	10.287	8.8615	29.523
5.797	7.2065	5.89	6.951
8.987	7.595	17.5125	14.351
60.1425	7.994	7.1145	6.775
10.4155	8.847	2.3345	19.2455
8.67	15.1225	6.9405	9.281
5.577	10.477	6.2255	6.5885
22.0845	1.2745	12.446	6.872
24.965	9.5125	17.597	7.072
50.6555	1.499	15.7325	6.3825
25.47	25.523	24.9135	6.931
7.594	27.705	5.74	38.5735
39.922	10.2275	6.766	8.1395
34.387	11.5095	26.7895	7.4385
31.6245	15.7485	9.849	21.3325
14.915	10.108	16.8315	6.589
33.922	1.2725	9.0645	9.6275
7.6555	1.898	6.4785	21.2875
13.0135	27.916	7.588	5.876
22.6	25.183	7.6345	9.794
10.5425	16.048	7.994	12.5135
46.874	13.1735	23.935	6.304
10.4745	7.3285	7.0995	8.893
37.1345	6.506	7.6155	14.31
45.5105	8.8655	18.094	10.9955
10.1575	22.5905	9.0255	12.4705
22.509	24.5005	9.548	5.207
49.1835	9.0135	23.686	14.425
47.238	27.6835	9.213	9.2225
71.2835	6.226	6.804	10.838
18.411	32.2875	12.8665	17.2605
10.595	10.1865	9.1555	6.078
60.649	48.3795	14.6435	16.8325
11.6845	2.74	7.5965	13.2715
16.761	1.7185	15.654	11.796
22.3935	1.8115	11.027	7.247
45.989	27.824	7.473	14.263
11.126	7.3745	8.844	6.0425
52.002	3.4795	16.0835	8.5545
6.712	6.431	12.644	58.935
13.4355	1.1615	6.205	59.9185
49.499	3.8365	8.383	8.199
8.6755	1.2405	11.3855	51.142
18.5125	4.1855	8.428	58.6275
8.7175	1.494	19.777	33.213
15.9425	3.035	13.2715	45.7445
49.5735	1.435	11.12	10.6815
8.7575	2.5285	5.435	112.937
11.7585	5.5695	13.2195	38.51
14.7445	1.376	9.765	10.08
6.8205	53.5265	10.131	43.393
9.6915	5.6825	6.915	32.487
16.172	8.8275	6.141	16.828
6.2795	9.337	6.072	24.9785
8.962	6.6865	6.3415	63.688
6.902	6.932	28.765	8.949
28.609	7.4285	13.6335	10.8485
47.23	7.968	28.3135	29.2065
11.327	13.1065	13.0505	14.27
40.2185	12.027	8.5465	12.3445
44.184	6.347	17.638	7.0525
39.296	8.1505	14.4475	14.7645
19.1365	7.031	13.1485	11.1205
14.998	9.758	19.1335	10.9295
39.9615	8.655	6.496	32.5185
13.674	7.561	29.336	42.2415
24.066	13.6515	12.6425	14.356
32.4215	11.722	6.4445	26.4065
21.831	10.754	8.2305	41.035
12.65	11.3345	10.828	29.737
35.294	7.5075	10.371	39.458
33.509	11.829	10.9075	14.8505
14.0485	11.925	7.3025	5.976
7.7125	7.466	18.857	23.2875
52.972	6.057	13.1845	6.7945
15.351	13.065	11.8505	39.304
19.8325	8.769	6.7955	76.672
36.3635	8.5765	7.283	55.514
19.015	30.6875	6.627	17.7285
2.1765	7.1595	8.8045	15.0675
10.108	10.6545	20.164	25.3045
10.94	7.2375	6.4045	11.117
10.326	9.378	14.6295	22.65
12.844	7.7705	23.349	15.606
8.918	9.8675	28.556	5.308
7.084	7.672	12.291	48.627
9.0765	9.765	8.6685	8.7155
12.1425	8.047	13.6965	72.7665
25.368	11.6295	18.982	34.72
8.1745	10.053	14.849	26.897
59.2845	9.564	13.4505	19.354
48.736	9.12	5.47	52.6845
37.3795	1.859	5.4565	117.716
13.6	37.6415	7.6665	30.806
42.983	34.6585	6.568	32.3985
8.0375	24.7645	16.074	6.6885
11.2975	15.2445	7.7175	19.7665
61.15	6.111	10.7465	42.8125
8.1655	18.527	26.515	8.8505
20.641	13.025	12.8185	12.224
16.001	38.0265	7.275	12.207
50.297	14.936	6.5615	35.054
11.518	52.4585	20.873	41.406
29.2495	116.656	5.286	10.65
10.672	42.1245	28.0675	17.4695
27.3795	37.3765	6.2425	25.6225
40.745	52.647	7.9365	9.6935
6.9225	31.844	5.752	18.7915
14.8975	28.004	14.8245	14.0325
49.9415	7.016	25.426	8.501
55.539	17.2555	7.551	54.7455
14.67	18.4735	11.8475	42.1215
14.95	40.3945	9.1015	37.4785
10.5115	85.5705	31.7585	16.0035
15.61	9.7125	5.4095	8.034
27.2645	14.9555	9.364	26.063
45.972	31.1665	28.698	57.8295
11.6355	34.043	8.755	10.425
12.7925	48.234	7.753	10.598
9.4985	19.1745	31.37	46.7795
15.29	13.223	9.6845	6.0965
29.483	7.087	8.1905	47.147
7.4105	6.009	8.3105	39.248
7.5705	30.6125	2.2505	9.674
15.0435	8.9745	2.8695	11.606
3.646	4.814	10.327	43.5745
5.998	15.8685	13.5325	44.0445
6.9205	14.6705	9.2855	10.3395
50.7035	45.832	16.1385	36.5305
15.096	38.61	21.9105	47.853
33.8495	32.945	9.0345	34.776
67.375	32.3885	20.5475	23.232
12.9485	32.29	5.6935	11.253
42.108	8.2615	21.8275	27.205
6.892	7.6635	5.0795	46.143
10.862	16.047	25.7915	12.5245
20.7705	11.5215	29.084	48.408
49.7675	9.1455	21.03	6.949
11.721	8.627	8.1975	34.761
48.4845	5.198	21.602	23.1595
29.188	13.2335	10.248	11.248
8.067	11.829	22.6615	27.19
29.255	8.799	10.0325	46.114
54.3955	8.8315	10.1405	12.559
10.3835	8.704	6.0165	48.358
11.961	8.9165	8.993	6.929
8.5285	10.4475	6.415	47.8785
36.8515	12.2145	8.4525	8.4875
29.7915	1.159	5.258	30.058
9.273	12.4855	8.0705	34.0255
7.681	68.996	9.466	12.3935
8.0025	7.4365	32.94	46.1805
17.729	9.1205	5.0735	43.395
12.3165	62.723	14.6345	12.438
41.624	8.227	6.659	9.1505
30.07	27.135	8.2465	5.693
45.7025	9.912	6.9225	44.9735
11.4815	19.767	12.158	38.719
11.6325	22.2055	8.661	19.7925
12.371	63.7275	5.106	20.696
12.6255	13.4965	6.0755	36.23
11.581	13.531	5.9615	17.139
9.823	6.804	5.2595	16.076
73.48	12.6605	29.841	5.9545
12.5295	3.1025	20.9715	27.166
9.093	15.855	19.409	20.86
16.567	8.6095	15.954	100.409
19.2415	2.5645	20.21	28.249
10.421	9.6895	7.1145	27.076
34.879	1.2415	18.64	17.724
7.0335	77.904	13.035	11.1645
52.4775	2.577	8.012	15.2935
12.5425	6.6585	9.1575	7.844
45.2305	77.8835	22.397	35.939
6.93	7.6635	29.068	32.3965
10.086	6.599	6.3375	48.3705
12.3375	11.0375	34.297	43.215
59.0665	8.174	15.9675	76.313
17.4735	12.9765	24.5395	40.2115
63.947	22.262	27.4955	28.354
8.475	10.5105	16.814	12.1015
11.692	11.322	16.0575	10.206
11.21	6.449	41.7415	25.312
60.286	6.999	10.5085	18.4995
19.274	8.359	15.1365	49.5015
7.804	18.485	11.535	9.0705
7.4545	2.276	4.9685	27.6175
15.822	62.089	5.844	27.293
7.8765	52.9915	16.3755	11.956
13.765	11.4625	7.364	28.0395
15.123	2.1495	14.1875	20.8555
15.271	2.597	13.7075	31.63
6.205	1.791	6.1315	42.2405
49.0975	7.953	6.769	38.2945
18.8485	4.5345	8.562	40.009
9.7595	2.27	6.8055	26.876
9.2	1.2695	23.577	88.7345
14.3615	3.629	7.1385	55.5745
4.8565	50.889	5.8615	24.581
6.8055	3.8875	14.2325	16.1765
9.6845	1.74	12.2635	41.1515
53.4765	1.565	12.4455	13.2065
11.7895	2.339	17.089	31.02
9.393	11.1995	36.271	21.711
72.5215	1.7075	5.5075	7.323
12.2615	35.8955	8.683	8.221
11.545	16.1605	14.067	12.594
12.885	44.6605	11.383	35.4655
42.98	79.008	5.415	14.072
21.607	23.7285	26.793	62.8935
37.349	8.4915	11.904	33.771
44.766	34.5545	7.475	57.2435
18.577	7.034	5.7295	29.7225
16.808	34.896	6.8145	13.629
23.3635	8.2815	24.8405	32.246
6.873	1.899	7.2005	33.7845
4.674	5.517	14.666	70.704
8.677	1.9025	28.4435	20.702
10.405	2.4395	12.725	14.5585
7.567	1.9145	9.276	40.547
28.7085	2.836	9.1	43.339
10.3365	1.8	15.795	25.4815
28.648	1.6515	43.925	7.6555
32.9345	3.539	7.1795	75.7755
17.915	3.3425	7.4725	61.048
14.3535	2.4525	7.2515	39.6685
13.936	2.0975	26.422	19.311
11.094	11.776	6.7745	18.4695
14.1195	4.631	17.2405	28.9725
8.029	1.3715	6.8465	30.2435
37.027	1.4605	8.1215	14.3645
85.476	3.468	20.05	29.0645
13.9095	2.0955	6.238	6.013
19.4355	5.751	6.385	7.145
11.821	4.3665	8.4245	14.066
62.138	1.5955	6.058	31.6715
7.5355	3.5425	12.3645	7.034
16.6235	2	19.91	5.2455
15.9625	3.3925	16.29	7.9125
1.835	4.006	6.9555	19.6765
7.166	1.513	10.006	9.0005
22.9605	5.551	6.321	7.7285
16.763	2.254	38.132	14.5715
70.2435	1.654	6.0005	13.4395
7.683	46.361	19.0605	6.0635
12.155	34.0625	44.2655	46.0275
10.759	49.347	16.922	11.9475
7.265	5.6235	4.684	10.787
8.2755	16.3805	17.2785	1.656
82.2375	50.788	11.5875	9.7435
33.9865	47.3445	12.086	16.036
14.207	29.341	16.2005	5.948
12.3495	88.0605	8.1225	7.088
17.834	26.222	22.669	7.0555
2.331	36.305	8.3735	5.7925
11.1155	80.615	23.968	7.3345
13.2565	43.7875	16.822	6.6785
24.572	55.5235	12.216	13.233
14.787	69.736	12.511	1.3525
17.0365	11.643	5.39	30.6125
9.5945	27.031	7.4975	7.088
6.204	45.4605	6.667	34.737
21.3105	8.6075	6.7065	8.954
93.5095	6.9295	17.5785	7.121
37.254	46.275	21.0235	7.0425
8.0225	7.6295	17.628	17.621
6.3315	13.9255	15.4775	8.2375
12.203	8.5555	10.477	39.1985
9.446	100.561	4.557	23.6445
28.3685	15.1685	26.2375	25.5705
37.9515	50.3705	6.747	7.8265
12.291	90.412	29.794	13.3425
11.771	33.592	5.93	6.7165
21.162	44.8705	7.3735	41.548
15.852	8.135	40.5985	7.502
1.484	49.606	7.2315	11.415
9.5685	16.907	20.202	48.1195
1.2555	76.4705	8.287	24.482
42.2415	64.751	33.23	10.0355
5.787	80.315	43.9025	6.289
11.991	10.3145	7.998	33.606
2.346	60.999	17.8635	55.8485
14.5355	6.9675	15.1925	6.329
10.707	16.9715	76.123	24.476
8.3045	40.8095	9.269	8.15
61.9485	48.105	41.2205	17.4655
27.7035	27.5415	8.303	12.255
10.998	41.574	1.288	5.3085
8.077	25.994	7.3105	8.592
16.8925	22.8725	7.92	24.446
11.046	9.0225	15.3765	2.8165
6.3525	14.482	25.039	10.0105
18.567	9.015	12.994	7.7325
9.96	12.514	44.171	9.015
16.208	9.5565	7.385	13.626
9.641	7.621	15.486	14.795
2.3975	7.7835	32.303	58.457
11.41	18.551	50.3665	7.577
5.1745	54.8775	41.2045	43.237
13.97	4.9535	60.3905	14.239
14.956	5.7995	34.2445	8.479
15.326	6.9775	43.0555	8.5295
59.492	8.857	5.183	29.13
6.8845	7.656	29.3395	7.0935
16.899	7.568	26.285	43.0775
14.14	9.4435	10.903	15.5145
12.8495	73.104	19.2885	77.5415
7.1735	11.3095	15.6435	14.2205
5.5755	36.924	23.2335	16.9715
7.758	87.885	10.692	68.3265
51.799	6.578	14.634	36.848
78.3725	12.6865	14.5755	18.4085
12.599	48.049	11.872	9.8875
7.4335	28.351	13.7515	38.3235
3.3255	85.378	12.269	15.362
2.994	65.9205	82.9305	28.1755
3.7785	90.5155	22.1105	13.7015
6.31	10.8955	9.835	31.099
44.001	6.053	59.3475	7.427
9.82	80.348	14.495	69.931
9.9	14.6075	11.119	9.4805
7.044	15.4435	12.617	37.217
71.197	5.441	8.076	50.7625
65.579	6.307	28.6925	7.595
60.3785	7.123	16.3605	11.233
25.1675	10.5355	6.8535	5.6035
14.299	10.1995	6.612	1.838
29.8085	12.5445	27.9605	11.593
1.8935	1.6505	12.117	7.3565
7.6665	6.6335	10.855	9.7955
44.534	7.4835	68.917	29.821
6.6125	7.403	13.5575	8.9325
11.9025	10.278	27.3635	2.373
64.857	16.4465	8.899	10.1955
12.003	1.505	13.0425	4.606
10.7645	6.5485	12.152	2.0665
8.2475	43.502	7.845	2.152
1.7865	27.7275	69.0375	9.7695
12.9295	7.6935	68.9195	1.8105
9.762	1.572	38.917	1.5355
12.9575	10.8065	9.029	2.3355
10.641	8.3885	9.806	11.5445
10.384	5.4665	12.8605	9.7545
15.2435	7.801	18.2465	7.656
98.2485	7.9925	21.0255	14.8605
19.903	10.296	47.982	8.387
16.556	8.142	16.739	3.1565
1.964	6.913	71.64	9.087
9.999	7.3735	43.8405	9.4665
83.42	5.641	24.258	1.902
7.401	5.325	29.0175	1.595
5.7315	6.619	27.559	9.21
1.505	12.8945	23.6235	9.7025
13.7725	7.4945	15.8155	6.416
7.2645	7.715	9.034	7.6395
14.0815	8.4675	32.771	10.383
6.8855	7.784	33.2545	8.4805
16.1895	8.911	38.3505	19.6655
52.769	17.457	17.217	9.079
14.508	54.1695	9.005	1.8905
19.5265	42.008	19.704	2.51
13.4515	69.9565	7.8095	8.3805
6.865	51.085	27.966	2.0905
7.0895	35.312	34.159	7.888
6.853	27.1805	9.927	7.751
7.9395	6.257	8.309	1.887
12.979	8.2175	48.6545	8.7945
12.0485	11.5955	51.4175	2.932
15.7455	8.1985	19.669	8.045
11.636	9.9725	8.1755	9.3875
10.2425	13.1145	61.8925	2.054
7.7495	10.5825	5.7735	11.5485
7.2115	57.1585	25.465	7.292
60.298	9.0005	14.5325	10.8515
8.402	5.452	25.686	1.8425
24.757	1.6935	16.8635	8.9005
37.994	1.822	18.515	7.379
9.803	7.0755	74.82	9.1665
49.738	7.0035	14.334	2.549
35.1	7.5285	7.4275	1.649
23.7725	7.3425	26.8115	6.5555
55.3885	2.234	44.1365	9.456
14.6195	22.047	14.3385	9.2585
1.906	8.057	11.5355	9.1715
8.615	2.5765	17.185	9.35
53.823	6.568	12.5465	1.624
10.1025	10.976	12.078	12.7045
13.865	9.4785	22.2125	2.7515
12.6715	1.479	8.026	2.83
50.5775	1.8765	16.934	2.829
7.7775	1.555	10.953	1.7975
14.595	9.8925	20.319	7.8845
48.0605	3.9195	8.5845	9.5235
5.2985	1.445	21.4185	21.924
12.976	10.7865	7.7535	2.94
2.8325	1.3855	5.57	1.756
15.218	12.8565	13.38	1.787
12.274	10.1925	13.4225	5.6075
34.1025	7.0725	44.534	7.852
6.7855	4.293	15.59	1.625
18.965	7.0905	9.9635	1.343
2.167	8.3575	43.0125	53.0395
8.017	8.0695	12.6675	45.268
5.0005	1.3575	7.8295	24.5225
3.816	15.854	10.0835	27.9145
14.4975	7.8425	7.647	45.732
18.116	7.1645	10.346	16.7035
10.0205	8.149	5.718	4.924
9.6275	11.1295	7.1995	8.5085
63.9485	15.758	16.7165	9.544
5.183	5.1495	19.568	8.6375
10.125	15.5415	8.7455	14.1715
10.428	1.68	1.5345	6.122
11.077	14.7725	14.5055	13.823
8.0645	9.2275	10.159	11.9585
5.739	17.696	7.874	7.0915
8.8555	8.052	7.9635	34.5455
31.711	36.1055	14.481	15.9825
33.1425	13.341	15.5935	8.4255
74.5035	6.2095	14.584	12.259
4.206	9.918	7.353	16.1665
17.5695	23.1935	8.514	7.699
16.367	7.006	12.112	12.637
18.2775	7.9095	7.164	7.5025
68.465	79.6555	28.8515	24.6615
39.6295	7.47	9.2385	7.0915
28.3355	16.3145	37.604	17.5665
56.4905	4.831	25.676	9.3175
27.856	8.593	13.0015	13.1555
10.7655	15.647	21.455	77.561
36.654	5.1425	23.7345	9.05
9.0755	7.0405	7.037	11.8915
10.6605	9.634	12.134	14.5645
16.7665	9.531	11.0755	28.258
11.945	1.7215	18.6655	52.4425
13.3355	2.399	15.84	15.347
93.4645	7.086	12.0595	20.8075
22.5735	11.2875	8.3045	6.0325
19.443	3.9295	6.9305	11.8405
87.806	1.299	6.787	45.9125
9.38	3.3895	5.0925	5.9445
6.447	2.118	12.433	21.035
37.6795	13.7325	10.213	9.588
13.7545	10.5165	6.9985	11.769
[truncated: 2,625 more rows]
