# Supplementary material for: Global and local tension measurements in biomimetic skeletal muscle tissues reveals early mechanical homeostasis
Source: eLife. 2021 Jan 18;10:e60145. doi: 10.7554/eLife.60145 (PMC7906603; doi:10.7554/eLife.60145)
Supplement: Figure 4—source data 1. [file elife-60145-fig4-data1.xlsx]

## Sheet: Sheet1
Tension (Pa) - PMMA mold/Spinning disk microscopy						Tension (Pa) - PDMS mold/Light Sheet				Myotube diameter (µm)			150 kPa beads		4% PFA fixation
day of seeding	day 7	day 14	geltrex control	SDS control		day of seeding	day 7	day 14		day 7	day 14		day 7		before	after
880.199	728.534	2941.8	127.469	153.402		318.348	3392.71	1519.45		12.3	9.8		888.81		3544.22	3543.28
124.634	3551.23	1856.95	742.263	294.183		228.899	1395.45	4447.87		8	10.6		654.484		2786.5	2950.16
502.868	3079.63	2605.15	404.03	189.326		826.886	3848.5	2222.64		10.5	13.2		726.427		3202.98	3199.09
998.658	925.51	3038.26	583.705	166.995		473.906	1991.55	2133.75		10.7	12		258.881		3067.26	2865.22
183.685	2641.06	3313.58	315.688	180.587		230.919	1584.16	1327.51		9.5	16.8		460.809		2466.61	2247.98
1046.29	2096.08	1325.84	354.213	143.693		898.578	2031.25	3543.28		9.5	12		774.332		1851.68	1754.45
735.525	719.641	2582.69	512.606	94.1773		578.093	2095.82	3628.92		10.9	11.1		861.043
838.294	2129.97	674.086	473.022	357.291		184.413	1996.6	2436.94		10.25	19.5		1071.99
592.812	2990.47	965.706	357.068	145.635		218.219	4511.95	1900.94		9.375	12.5		590.152
368.864	3016.17	3430.24	771.458			181.782	1880.42	2228.73		11.76	16.4		292.581
294.862	2164.36	2261.53	326.339			348.873	3326.84	2950.16		8	14.2		670.892
246.803	3000.92	2014.48	812.905			591.696	2049.67	3199.09		8.5	11.8		518.868
458.003	628.677	942.88	1001.73			516.878	2428.09	3792.19		12.2	11		400.273
841.547	1987.29	1713.3	99.2745			356.408	3236.16	2723.36		10.9	15.4		1252.16
539.461	2872.7	1273.34	195.772			400.817	2220.52	2969.05		9.4	15.3		1317.7
826.129	3699.33	2036.36	469.236			380.399	1704.76	1751.44		9.2	14.6		1010.77
713.495	3507.83	463.294	446.672			437.963	2659.4	4065.5		11.2	11.2		196.248
601.278	4017.72	2374.72	134.217			548.607	2143.82	1970.99		9.6	11.4		935.181
749.059	1881.15	972.754	516.383			840.343	1702.55	2915.12		12	11.6		415.225
378.719	2289.62	2454.71				255.065	1383.7	2871.15		8.2	14.5		1224.29
299.581	2644.44	1221.01				685.29	791.885	1180.19		13	14
637.58	1530.98	3169.36				597.259	1499.79	946.686		11	17
388.564	4095.93	2373.49				157.907	2521.03	3237.8		7.9	16.7
659.183	1541.23	2518.62				84.0605	3403.98	1774.74		9.8	11.5
692.766	3426.66	1373.64				123.644	2121.18	1745.2		12.8	15.4
573.928	2981.96	3200.32				594.27	3383.5	1389.23		10.8	14.5
271.745	1138.23	2418.69				582.491	1690.24	1450.56		12.1	17
		3155.59				386.952	2292.81	2580.71		9.8	12
						687.514	1941.66	1778.28		12.4	14.6
						767.438	1354.91	779.604		12.7	14.4
						331.805	1527.78	1969.8		10.9	15.7
						700.601	1906.34	1971.03		9.4	15.3
						842.576	1695.44	3367.83		11.7	10.3
						193.588	3597.17	1261.03		8.5	14.3
						505.878	3607.8	1751.79		9.6	16
						633.571	1264.61	1447.48		11.6	9.2
						371.991	1537.26	1518.01		10.5	15.4
						688.019	1797.92	910.753		10.3	15.3
							1525.56	1003.72		8.5	13.8
							2355.7	1984.93		10.6	12.1
							2476.16	1664.24		10.4	21
							612.686	829.022		10.8	12.4
							3586.19	1663.09		9	13.5
							2233.57	2045.8		13.3	15.1
							1265.25	1520.46		10.8	13.9
							3060.09	2398.69		9.9	12.1
							1198.44			11.6	16
							1585.27			12.5	12.4
										9.9	10.3
											12.3
											11.5
											7.8
											12
											10.6
											15.6
											15.5
											14
