# Supplementary material for: Global and local tension measurements in biomimetic skeletal muscle tissues reveals early mechanical homeostasis
Source: eLife. 2021 Jan 18;10:e60145. doi: 10.7554/eLife.60145 (PMC7906603; doi:10.7554/eLife.60145)
Supplement: Figure 4—source data 2. [file elife-60145-fig4-data2.xlsx]

## Sheet: DATOS
day of seeding						day 7
Bead Position			Tension (Pa)	Angle (°)		Bead Position			Tension (Pa)	Angle (°)
x	y	z				x	y	z
0.91763	-0.78079	-0.61607	810	-29.3055		0.2266	-0.53432	0.14768	-5621.24	1.5346
0.042297	0.1529	-0.50788	560	13.521		0.27415	-0.34703	0.42184	-2569.51	-15.3891
-0.89468	1.469	-0.31304	1320	-65.3888		-0.20376	0.20906	0.40439	-3087.64	-14.7508
0.64654	1.4721	-0.4076	772	-35.1506		0.76973	0.73043	0.31428	-2549.77	-4.0891
-0.33415	0.98634	-0.074432	1126	-61.0502		0.4677	0.29697	-0.35042	-3661.05	41.5883
-0.84091	1.5037	0.097294	748	-20.4184		0.45976	-0.27531	0.35417	-2569.12	4.1979
-0.9139	-0.66118	0.34587	1008	50.2763		0.42583	-0.096188	-0.1861	-4866.81	38.1019
0.65828	0.15429	0.36141	996	56.6379		0.2966	-0.41393	0.62011	-7413.15	1.8464
-0.49632	1.1207	0.29984	161	-26.2128		0.0068218	-0.27636	0.47487	-3051.32	0.7004
1.0862	0.11622	0.38133	1062	77.0306		0.073751	0.8059	0.23623	-6836.96	-4.7376
1.1902	1.118	0.51409	641	79.0267		0.57718	0.26413	-0.70724	-2225.16	-3.8884
1.2749	0.57617	0.75373	948	3.2924		-0.24621	-0.21185	0.4726	-1940.05	11.0294
0.97756	-0.68642	0.82357	228	57.7266		-0.19788	0.82661	0.31947	-2548.71	1.0696
-0.054254	0.29214	0.81545	1160	81.6365		-0.49216	-0.11947	0.54845	-3519.18	-101.475
0.91531	0.33886	0.76949	632	-73.48		-0.39439	0.33943	0.048305	-3780.67	57.0916
-0.75067	-0.41453	-0.6129	667	1.4833		-0.34985	0.97917	-0.47077	-3642.55	15.8466
-0.46004	0.65657	-0.74917	568	80.3995		-0.14008	-0.49662	-0.43282	-3224.05	-17.9665
1.4077	-0.26683	-0.18942	1416	-70.232		-0.10761	-0.13408	-0.037895	-3302.58	-65.8004
0.013867	0.7101	0.12872	366	85.3935		-0.024454	-0.13007	0.33216	-2834.45	64.8925
-0.25779	1.4653	0.014462	529	-38.5441		0.016559	0.84085	-0.17563	-3233.65	-24.3271
0.067032	-0.27693	0.23847	223	-45.5173		0.067799	0.57064	-0.66797	-3548.73	-12.8085
-0.40842	1.1209	0.28464	1119	12.104		0.075718	0.6274	-0.41078	-2203.7	-5.6421
1.5869	-0.99863	0.54343	846	-71.4939		0.087471	-0.51699	-0.3388	-1730.45	-0.6279
-0.46446	0.82531	0.76362	472	47.8526		0.22696	0.51085	-0.37289	-2764.14	85.5287
						0.31042	0.77325	-0.24445	-1279.37	-11.0373
						0.34118	-0.13237	0.42103	-2204.31	-34.8635
						0.33385	-0.47667	0.59808	-1918.93	-19.4198
						0.56316	0.0071069	0.2438	-2758.07	6.8501
						0.48669	0.99672	0.026657	-2089.85	6.8702
						-0.46837	0.12521	0.078774	-2138.74	-18.8149
						-0.38875	-0.079197	0.42973	-1685.77	18.3369
						-0.34338	0.26616	0.039643	-1434.7	23.1662
						-0.34971	0.81779	-0.45445	-2841	0.8714
						-0.27246	0.16758	0.27551	-2281.2	-21.3789
						-0.26128	0.31683	0.12444	-3948.53	-9.0728
						-0.043754	0.57443	-0.99375	-3153.38	-83.4944
						0.13745	0.58018	-0.99375	-2842.75	14.9722
						0.3161	0.81068	-0.3367	-3073.53	28.4693
						0.11297	0.15196	-0.08115	-1284.39	13.1206
						0.54707	-0.071222	0.5246	-1105.8	0.8648
						-0.33625	0.43911	-0.059524	-4104.52	-0.4118
						0.53708	-0.55945	0.12145	-1600.12	-34.6417
						0.4972	-0.30207	-0.20349	-2649.54	14.0454
						0.66562	-0.51245	0.23197	-3936.07	-28.4707
						0.66109	-0.31733	0.36328	-1622.62	-7.8798
						0.61494	-0.15633	-0.077182	-1881.33	4.635
						0.67917	0.50182	0.52803	-1644.58	-0.5535
						0.61471	0.56185	0.22446	-1582.9	14.7649
						0.42742	0.35947	-0.37219	-2392.04	13.0467
						0.054074	-0.17391	0.031493	-4072.61	2.435
						-0.079866	0.21197	0.31462	-1119.55	-30.761
						-0.11749	0.48395	0.55216	-1985.19	11.1982
						-0.20611	0.47628	0.5917	-1147.03	-13.5945
						-0.50721	0.56661	0.40437	-2166.51	-0.1666
						-0.33787	0.80986	-0.3567	-1688.29	-23.2937
						-0.37875	0.16703	0.24492	-946.793	103.314
						-0.19347	-0.30347	0.37739	-1292.12	0.0458
						-0.20404	-0.43528	0.30525	-3664.86	-2.8955
						-0.23714	-0.57639	0.44006	-2492.89	2.5075
						-0.50721	0.56661	0.40437	-1357.4	86.9339
						-0.52938	0.66679	0.061002	-2650.75	27.7138
						-0.53267	-0.32554	-0.12667	-1857.48	-43.5902
						-0.28782	0.55447	0.23075	-3178.91	-29.4958
						0.77796	0.77555	-0.28856	-1932.51	29.9322
						0.26806	0.15487	-0.68165	-2012.74	7.531
						0.27526	0.25336	0.29869	-5913.59	11.5235
						0.15892	0.76503	-0.43468	-5130.9	5.0058
						-0.038156	-0.018596	-0.31576	-3733.23	5.1385
						-0.022051	0.049435	0.42063	-2998.95	-7.314
						-0.037622	0.3463	-0.083615	-983.748	10.5046
						0.71754	-0.27677	0.46267	-2733	-18.9548
						-0.28782	0.55447	0.23075	-2673.11	-15.867
						-0.3984	0.49945	0.1442	-1252.03	5.7927
						-0.57709	-0.40723	-0.11404	-2079.94	-4.2982
						0.57492	0.43441	0.58298	-4335.65	14.5159
						0.60784	0.98947	0.08496	-1415.07	31.3155
						0.41755	-0.11176	0.50618	-5416.56	3.1538
						0.38361	0.24588	0.20532	-4485.14	-87.6758
						0.34477	0.85923	0.42183	-4821.46	17.9982
						0.10844	0.027339	0.77846	-2825.99	-18.2195
						-0.052431	0.59435	-0.10678	-3485.1	-20.4076
						-0.11255	-0.19181	0.61458	-5494.99	-2.3735
						-0.27255	-0.063777	0.72684	-4652.75	0.3718
						-0.44695	-0.31744	0.55621	-5914.58	-2.21
						-0.48132	-0.2734	0.23179	-2142.59	-2.6936
						-0.49418	0.15688	0.33223	-4199.34	81.8593
						-0.41368	0.66593	0.67295	-2848.34	-9.4894
						-0.36057	0.87498	0.27251	-3022.04	-3.8613
						-0.39954	0.54013	-0.33213	-2829.24	-0.7756
						-0.25027	0.056111	-0.16153	-883.933	-57.6288
						-0.31452	0.090026	-0.23107	-2418.55	-40.7958
						-0.29615	-0.10905	0.025135	-3548.73	-9.826
						-0.074204	0.12147	0.073386	-5035.4	-7.7224
						0.42581	0.57961	0.32402	-2156.6	4.1159
						0.42051	0.45122	0.30876	-4795.02	-4.7522
						0.6188	0.69475	-0.47106	-2889.25	-8.1313
						0.63938	0.12644	0.15286	-3721.23	-73.7925
						-0.56688	0.43129	-0.78872	-2087.44	-10.4718
						-0.51827	-0.42775	-0.67692	-4961.66	-13.2656
						-0.37947	-0.57928	-0.66809	-1255.36	-9.5566
						-0.17904	-0.23005	-0.61932	-5094.22	0.7806
						-0.038685	0.52952	-0.73603	-2969.43	-4.6845
						-0.0090052	-0.38833	-0.59676	-2866.63	0.0815
						0.027214	-0.20942	-0.68578	-3601.31	4.4369
						0.16318	-0.45536	-0.72366	-7203.63	2.8727
